# Supplementary material
Source: PubMed Central journal article supplement (PMC2980585)

***Diastereoselective Nitrenium Ion-Mediated Cyclofunctionalization  
Total Synthesis of (+) Castanospermine***

*Duncan J. Wardrop\* and Edward G. Bowen*

Department of Chemistry, University of Illinois at Chicago,  
845 West Taylor Street, Chicago, IL 60607-7061.

***Supporting Information, Part 2***

\* Corresponding author:  
Tel: 312-355-1035  
Fax: 312-996-0431  
E-mail: wardropd@uic.edu

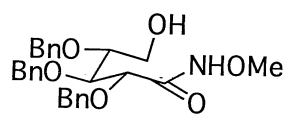

8

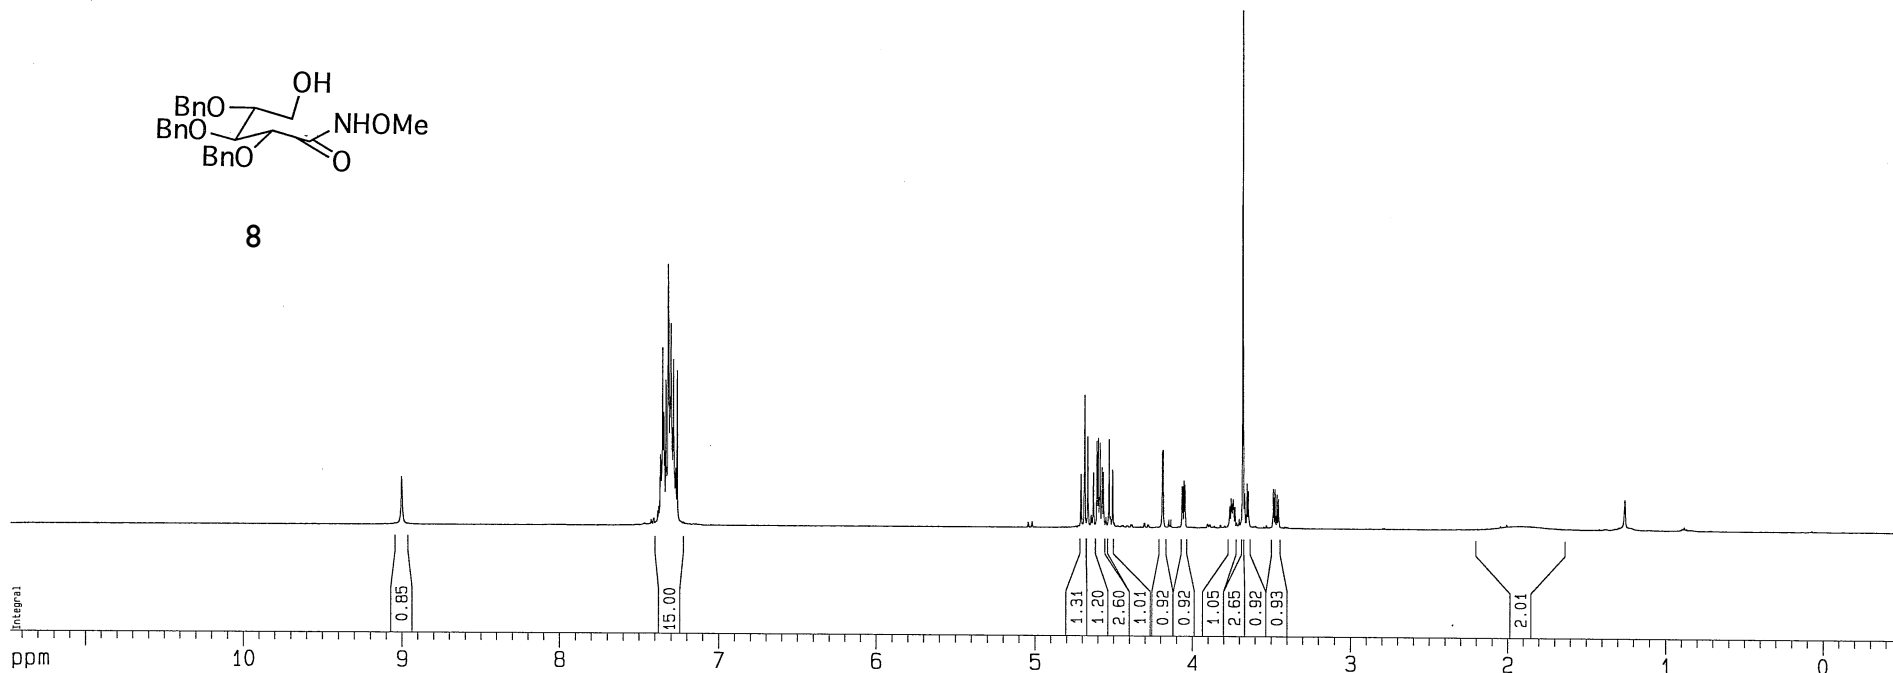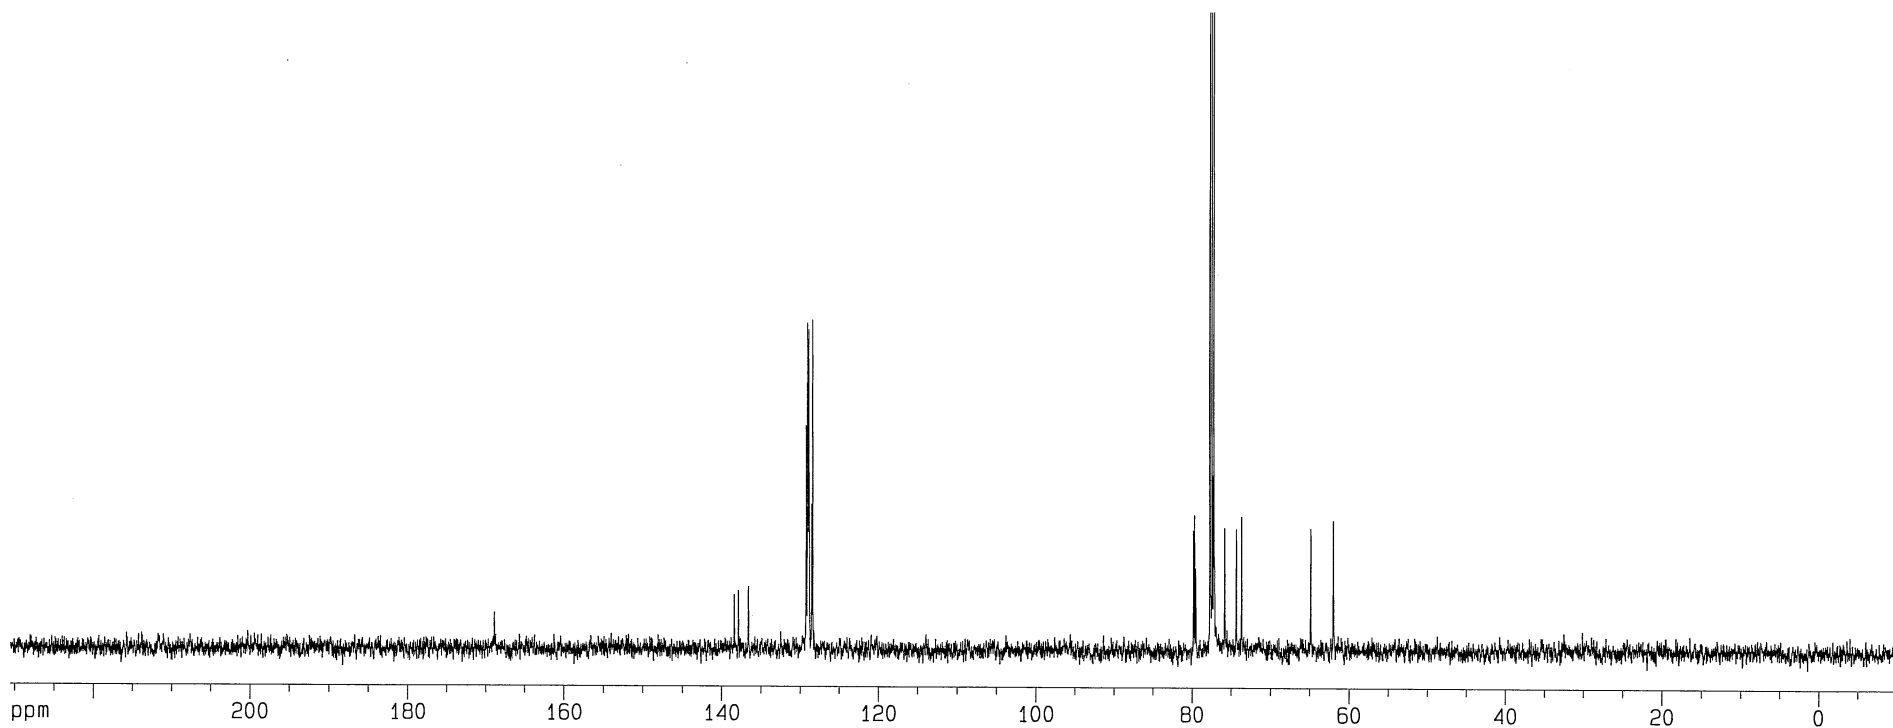



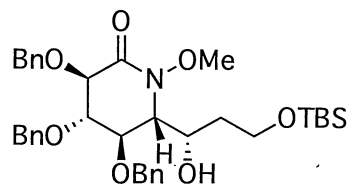

II

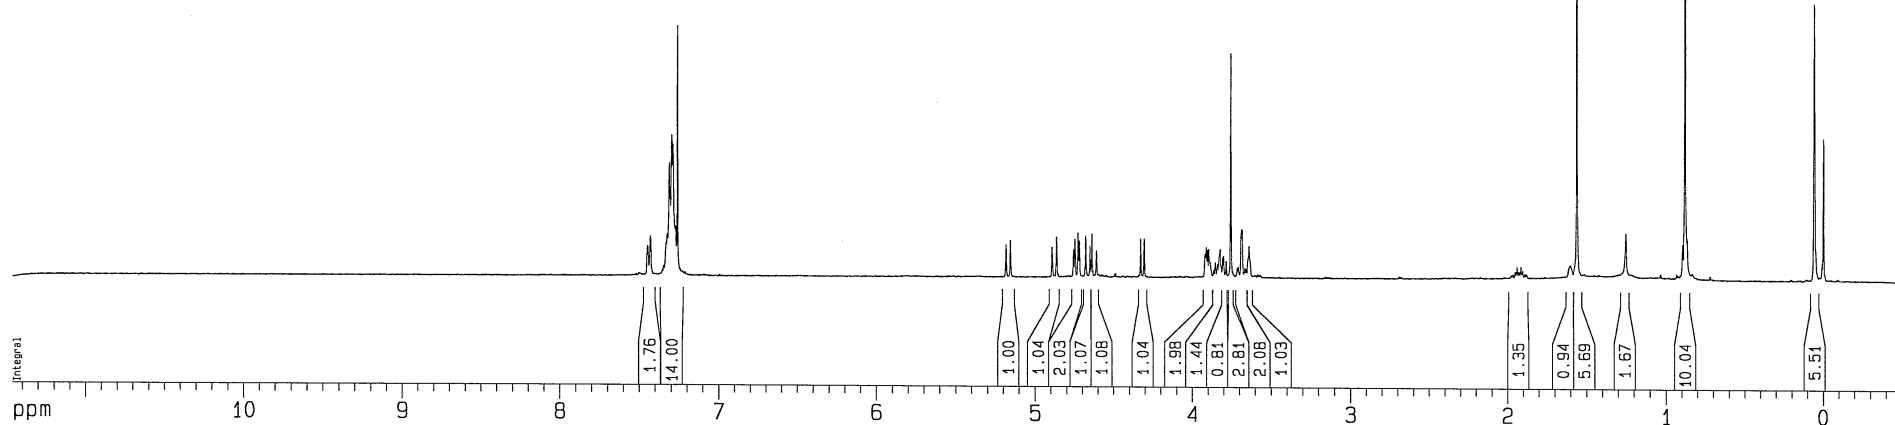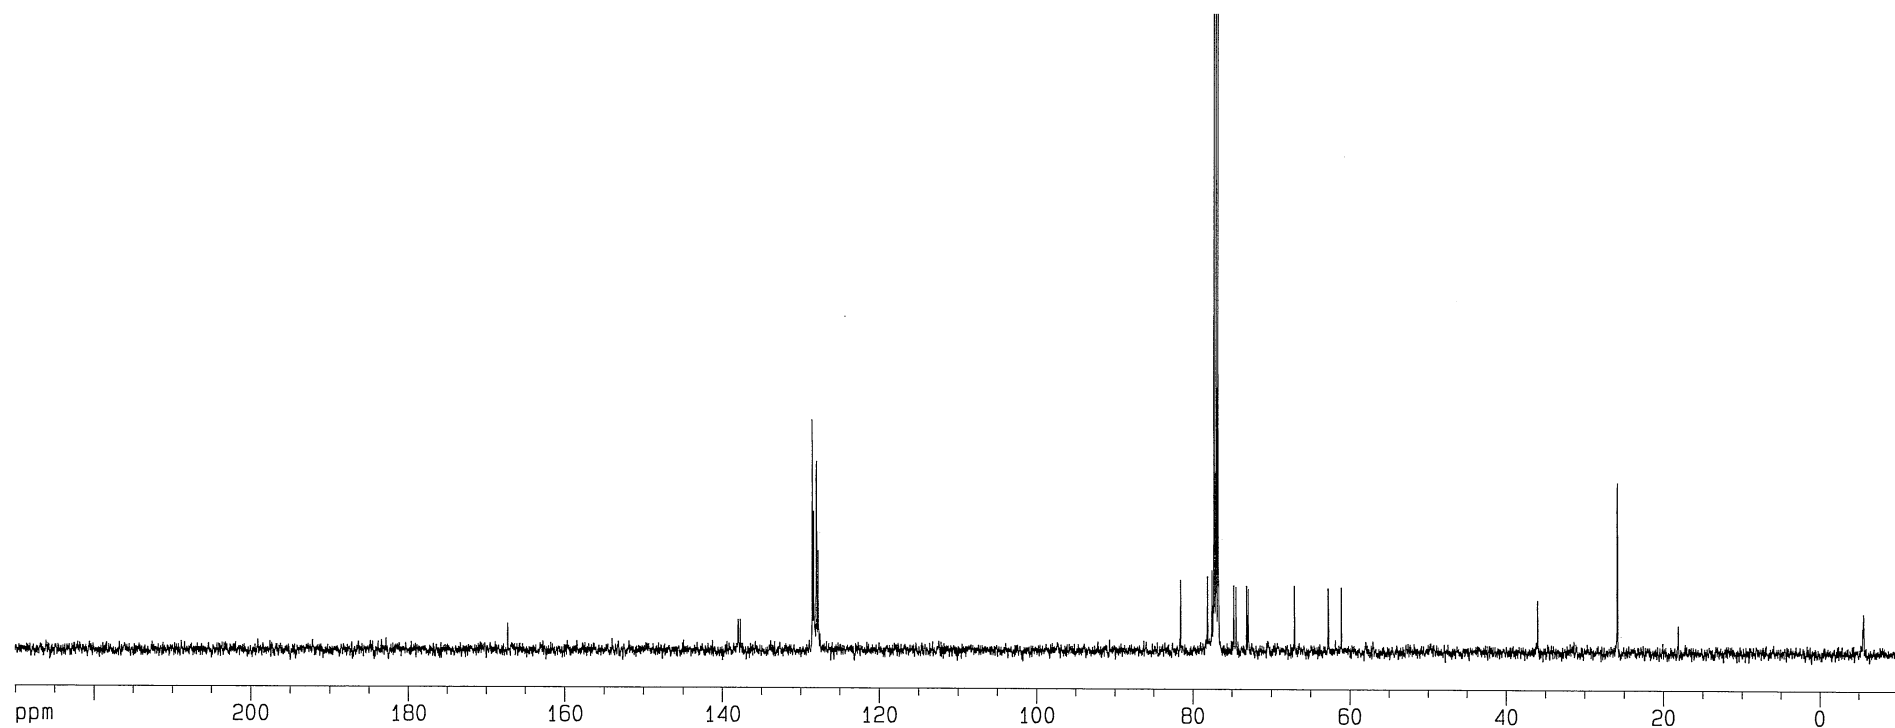

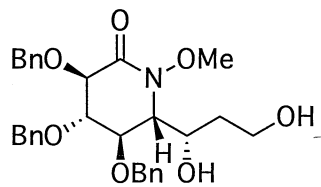

12

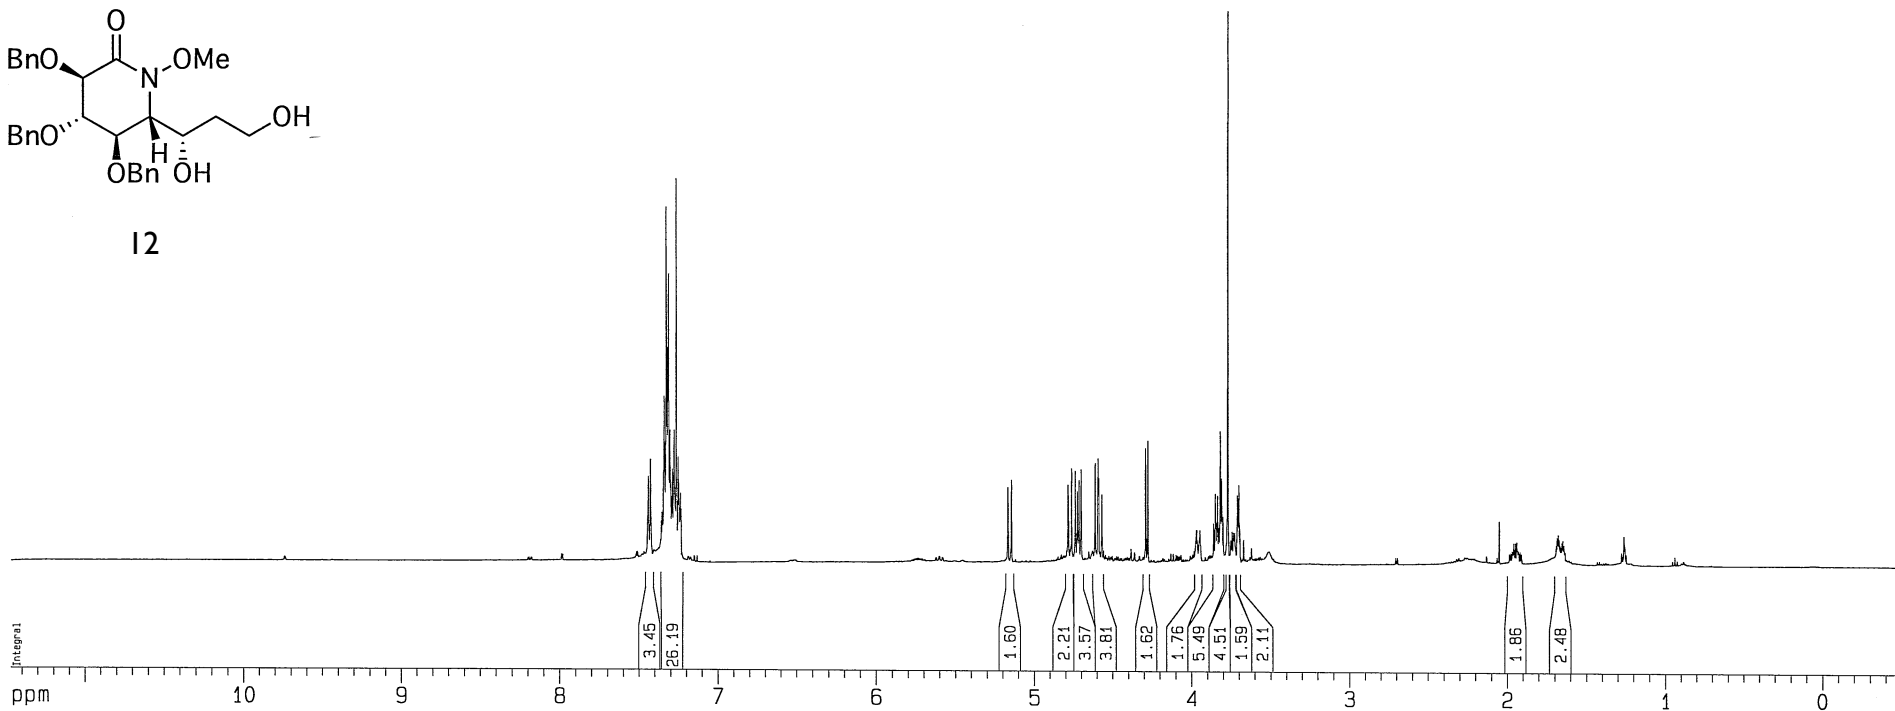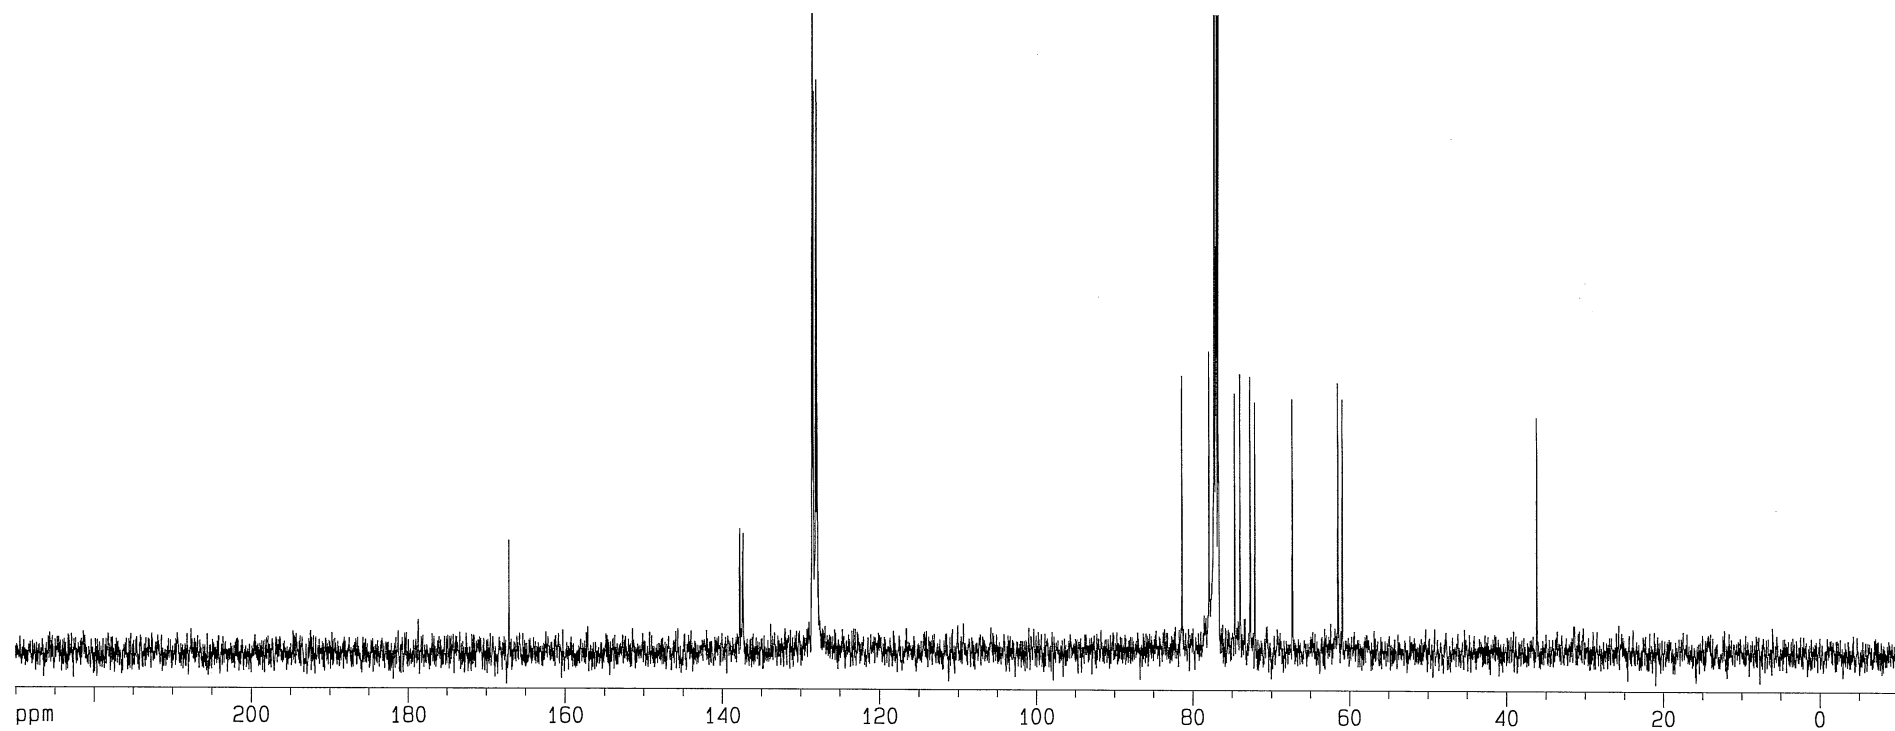

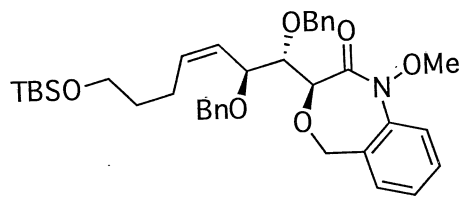

13

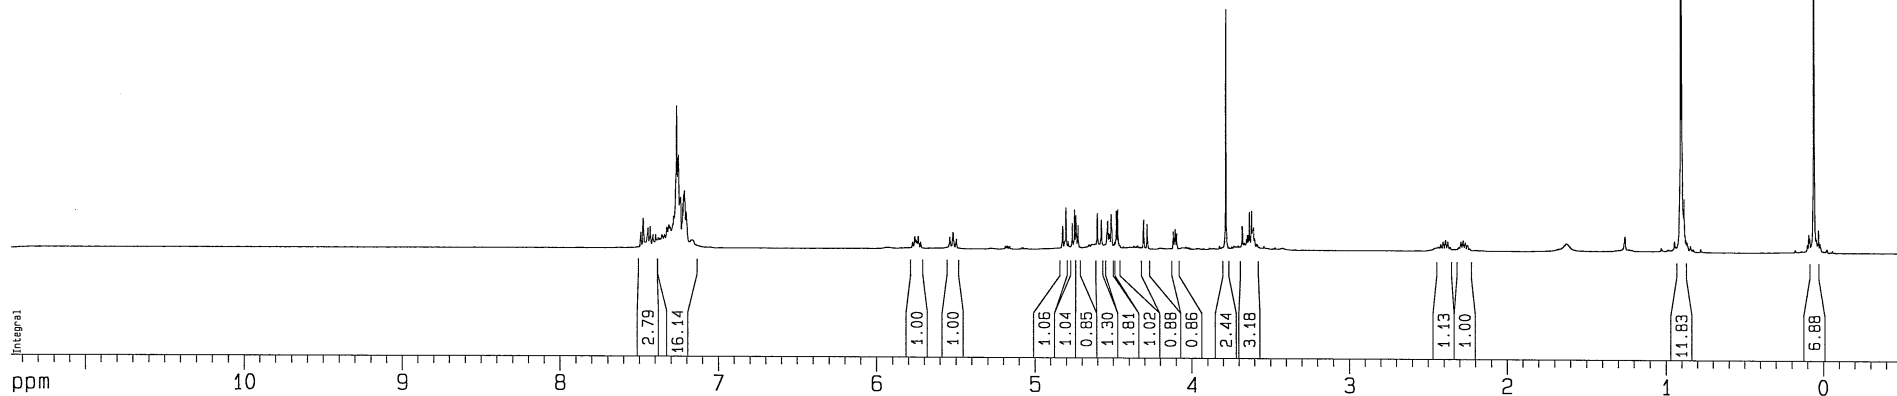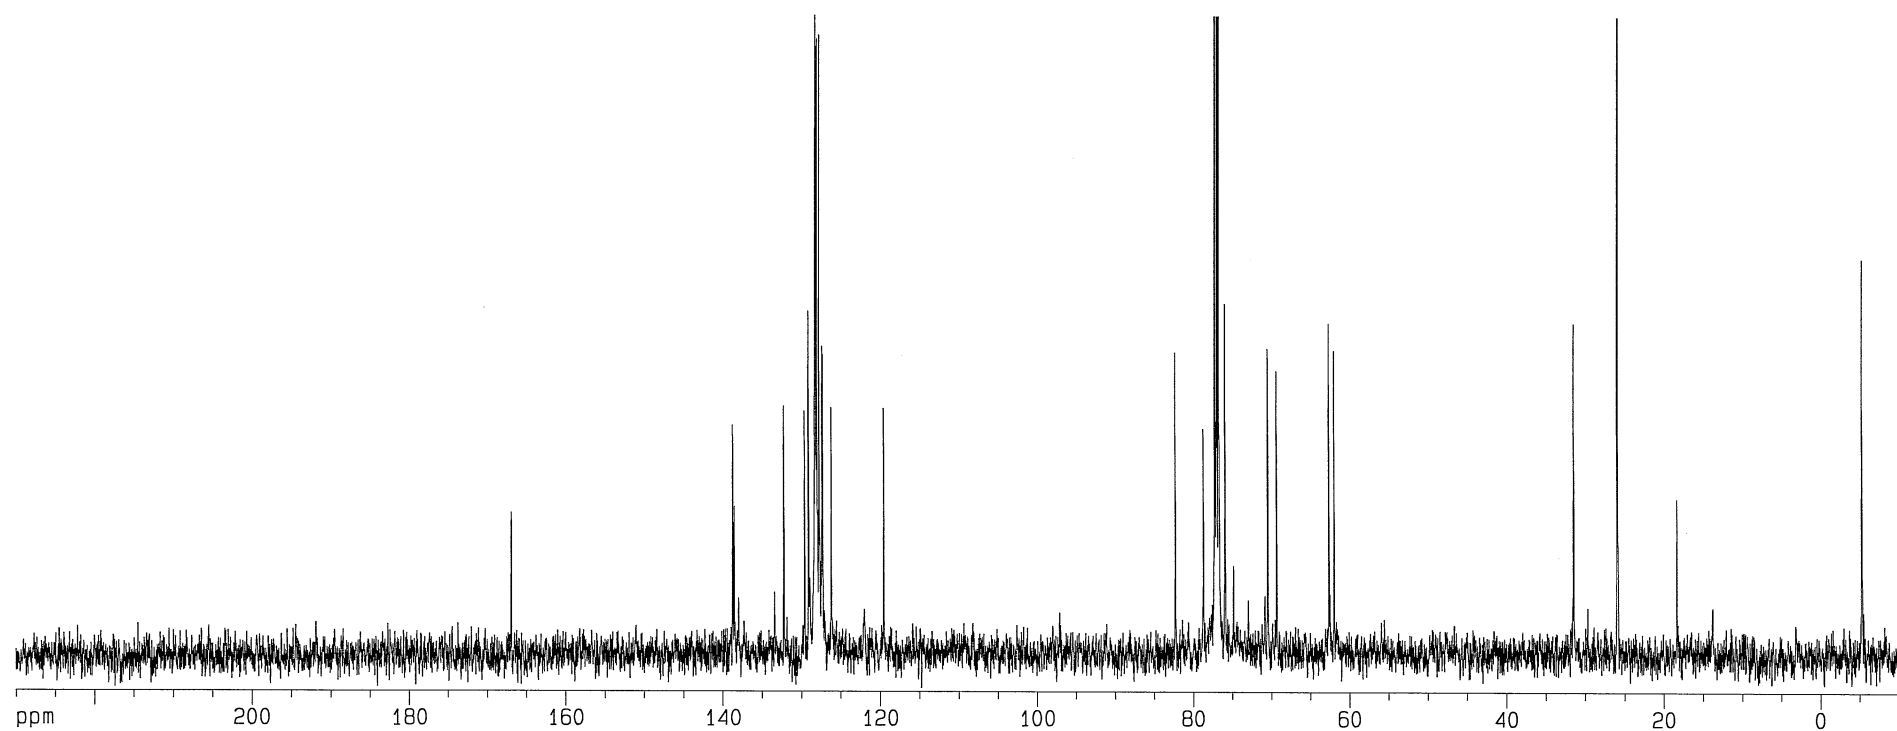

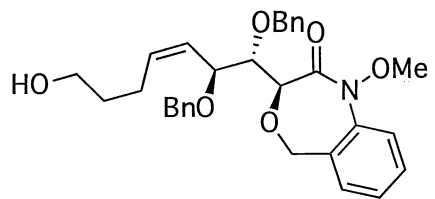

14

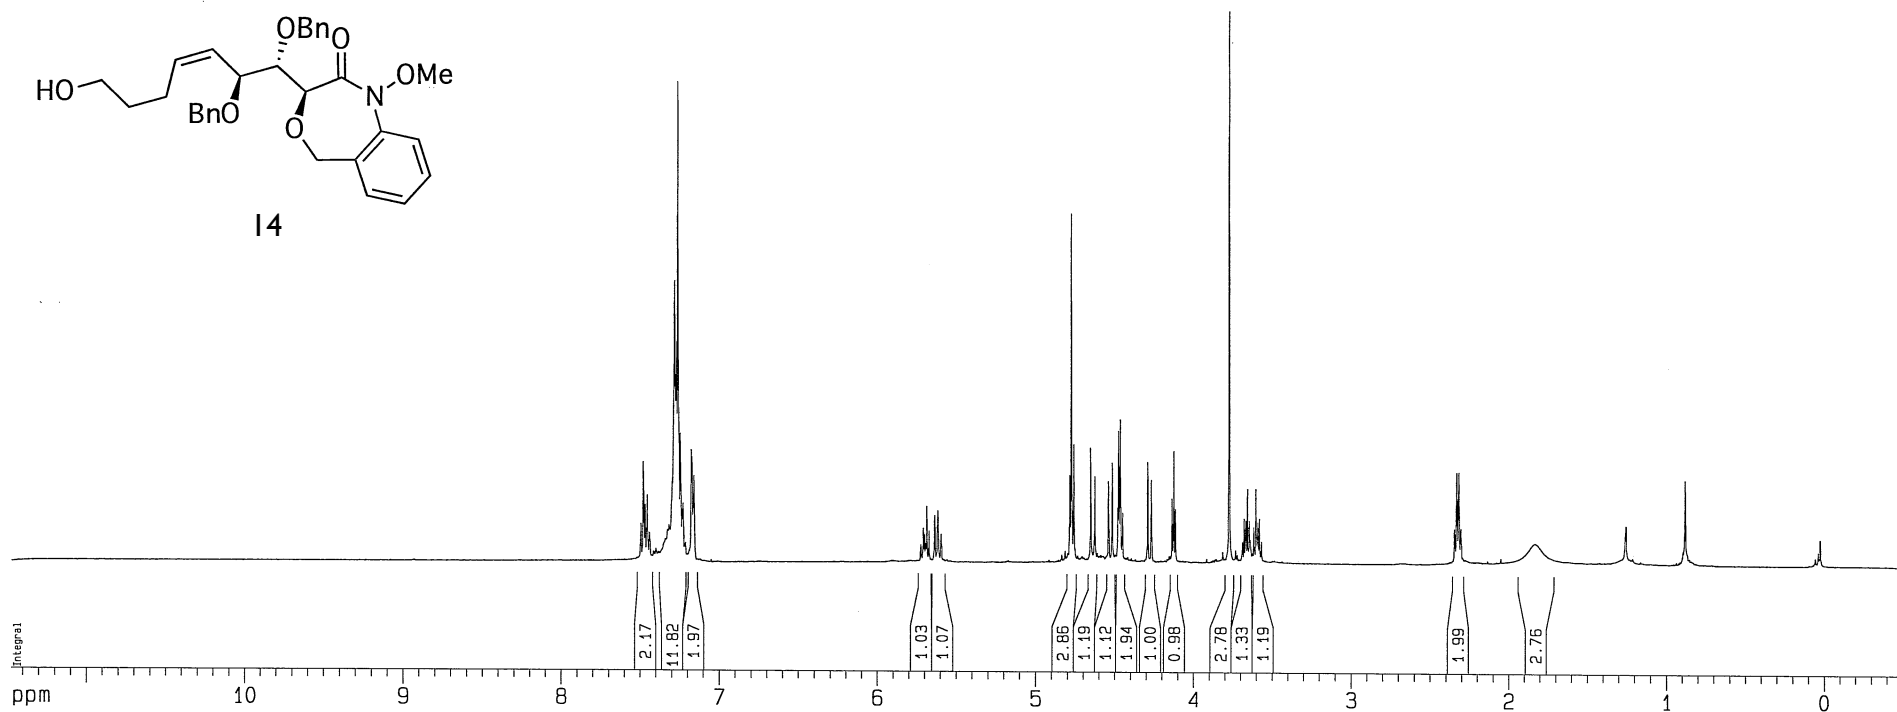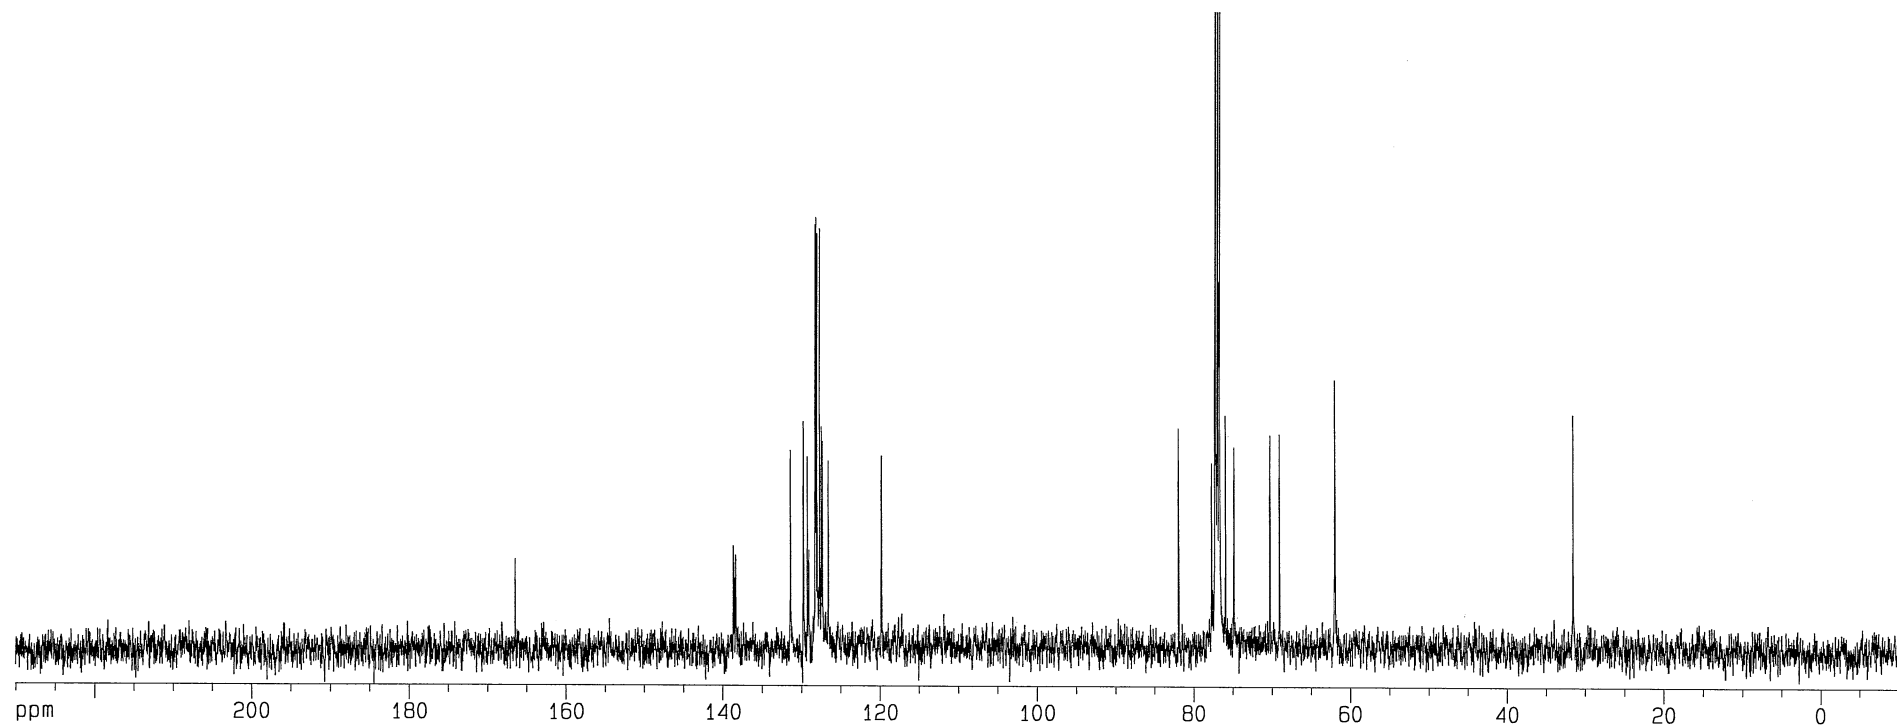

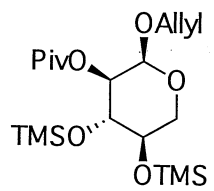

25

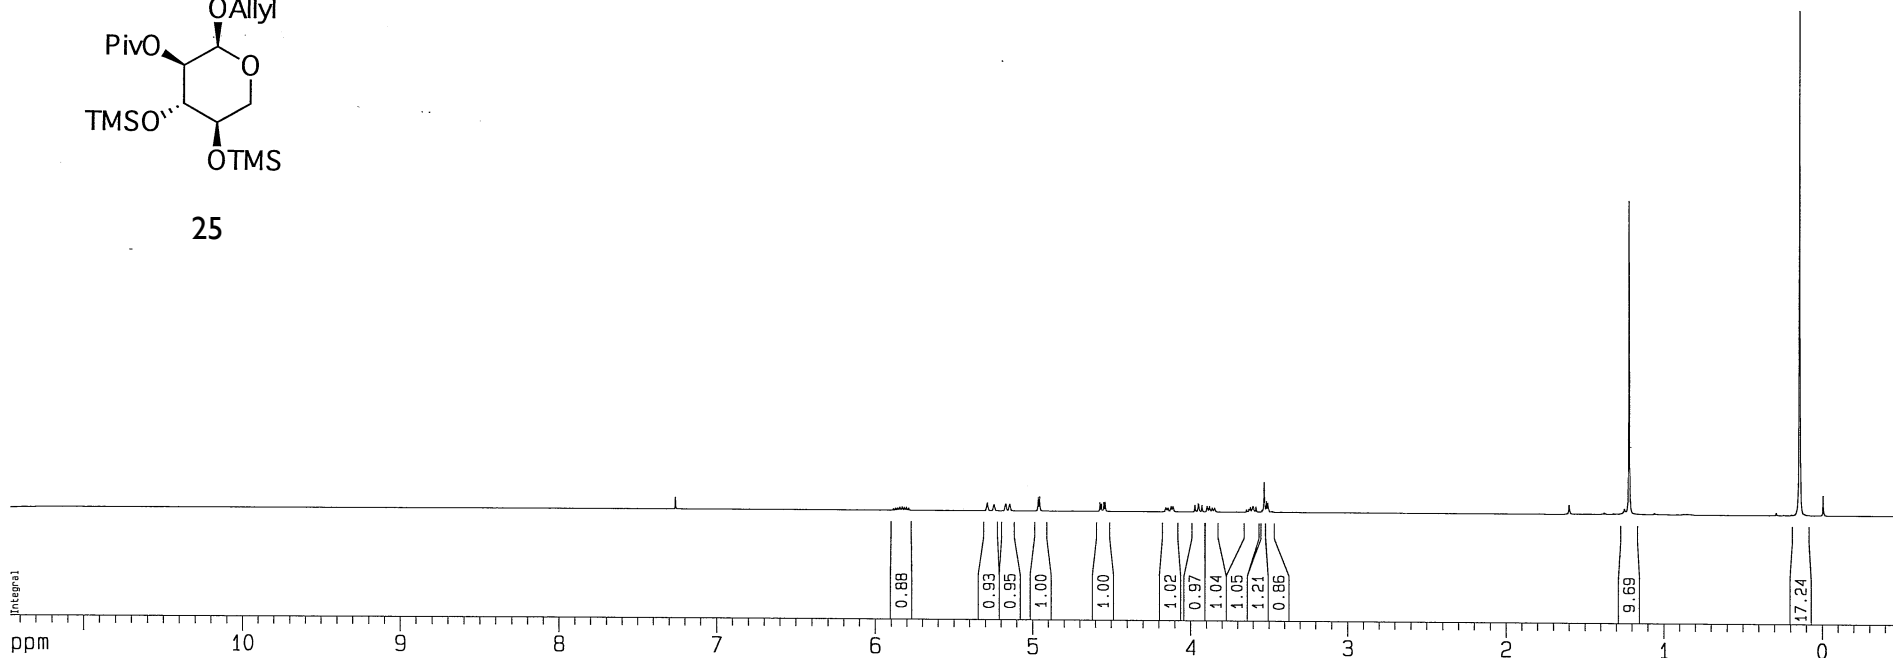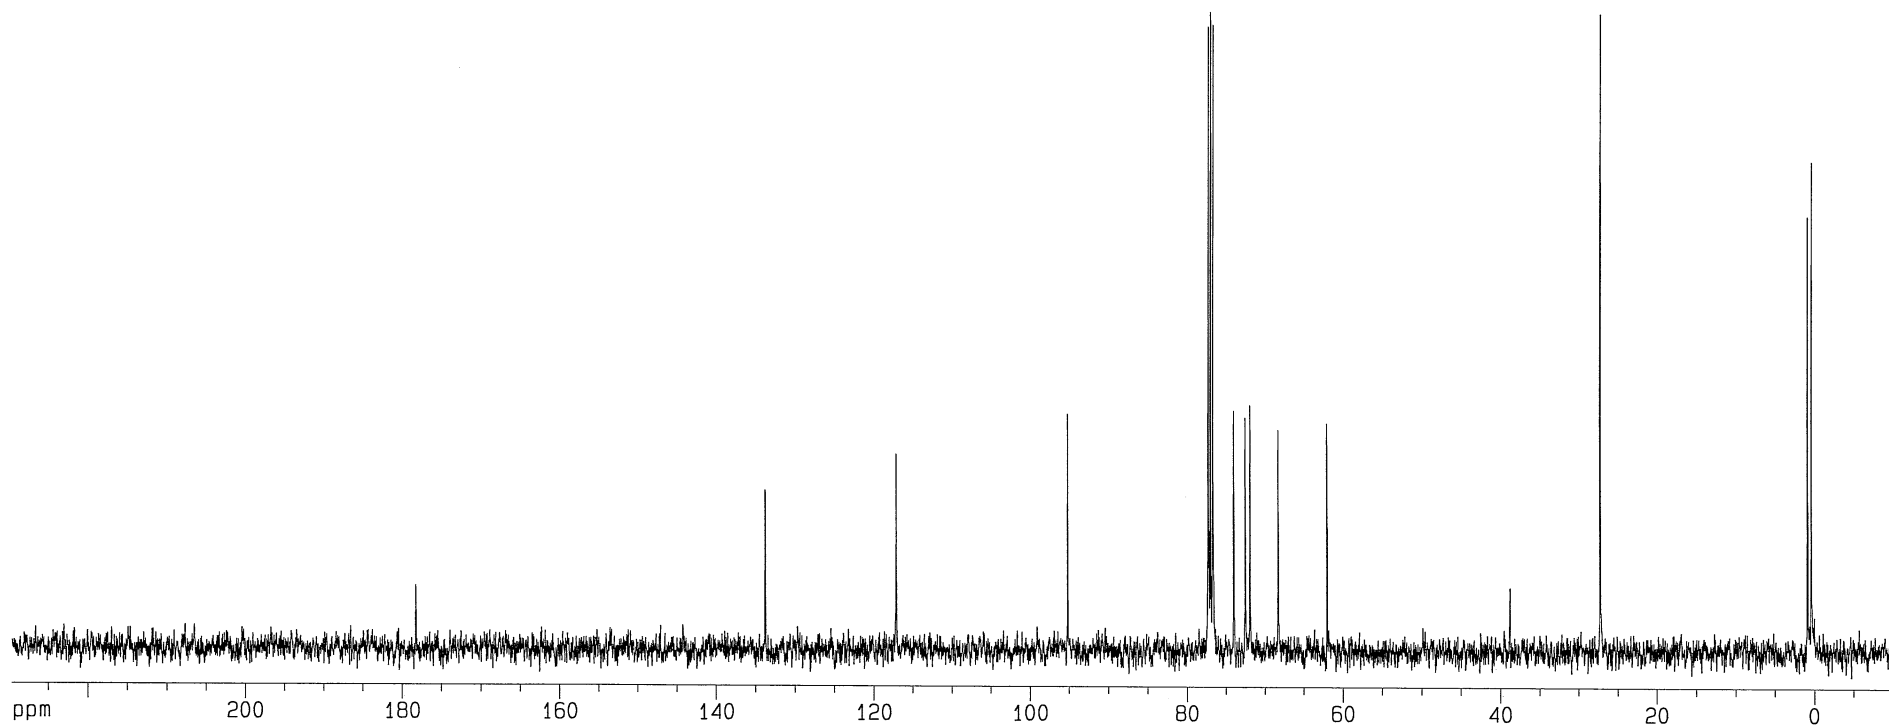



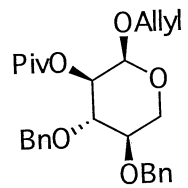

16

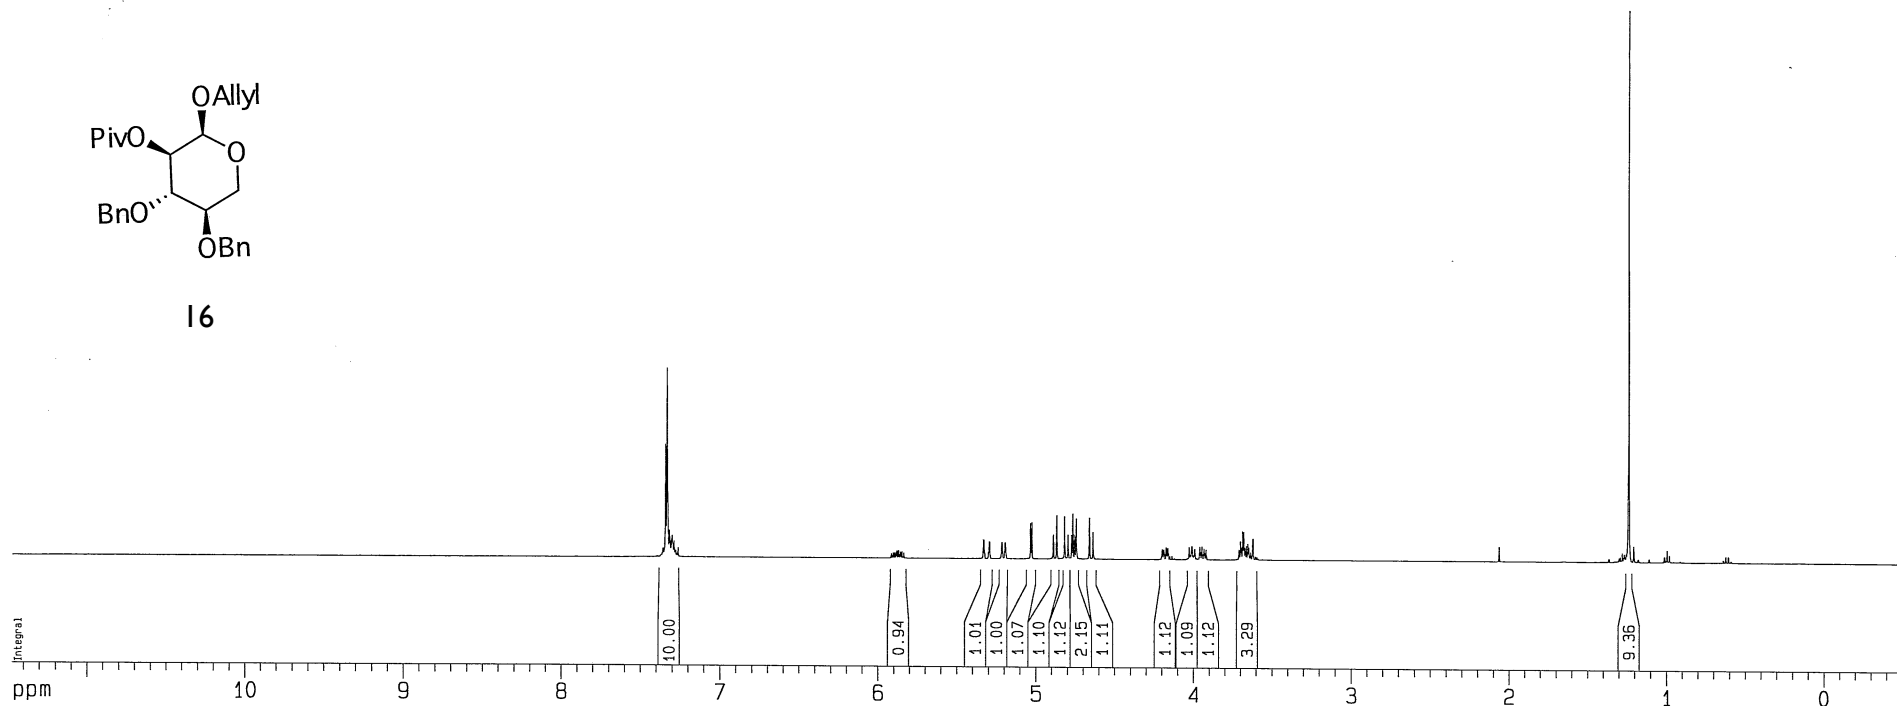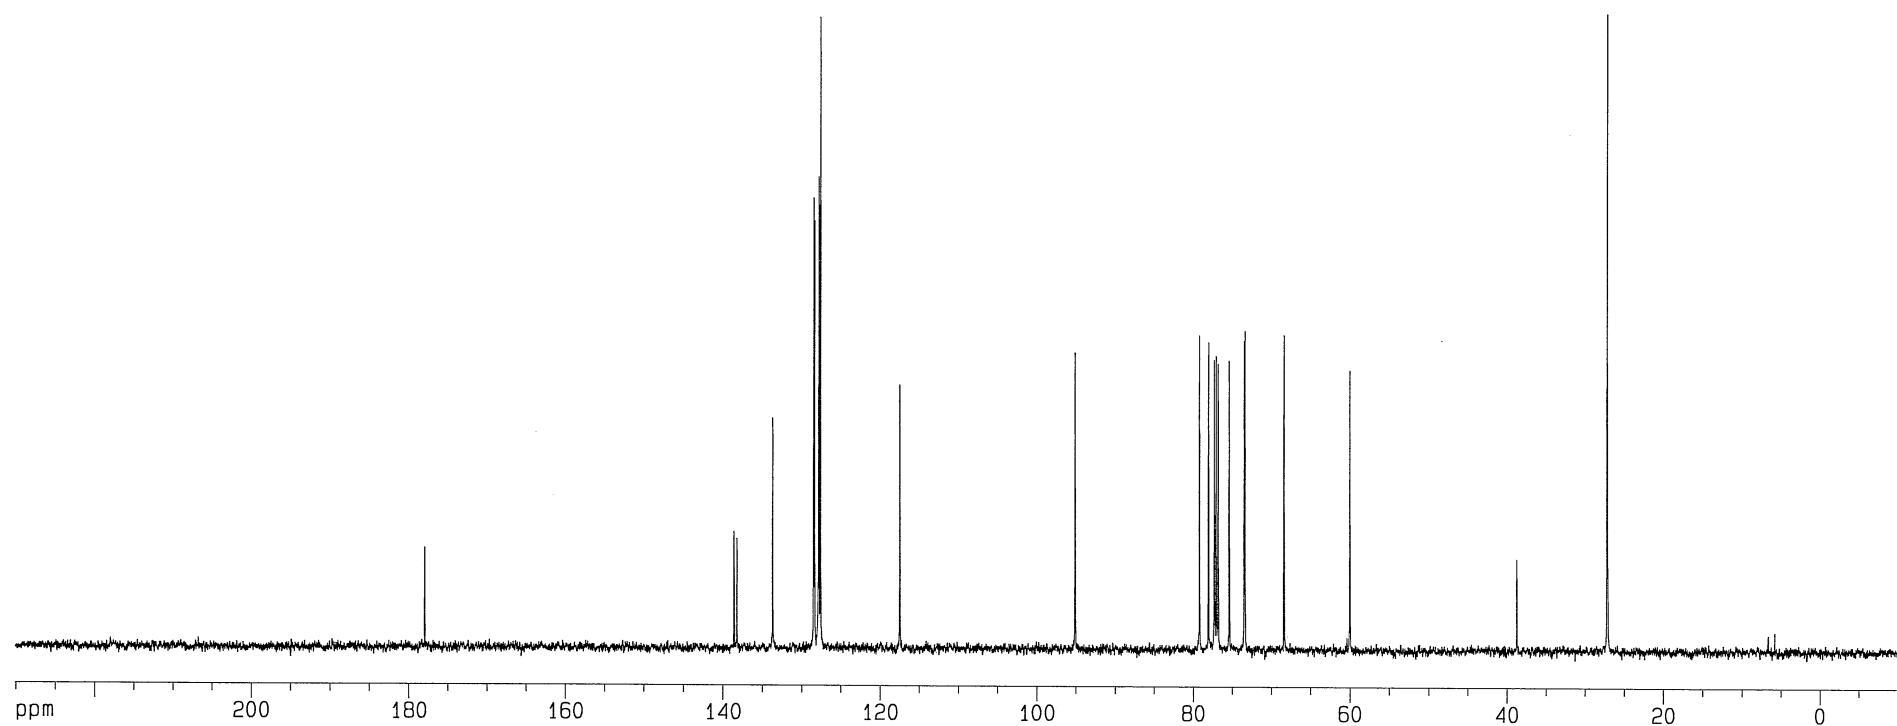

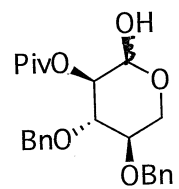

27

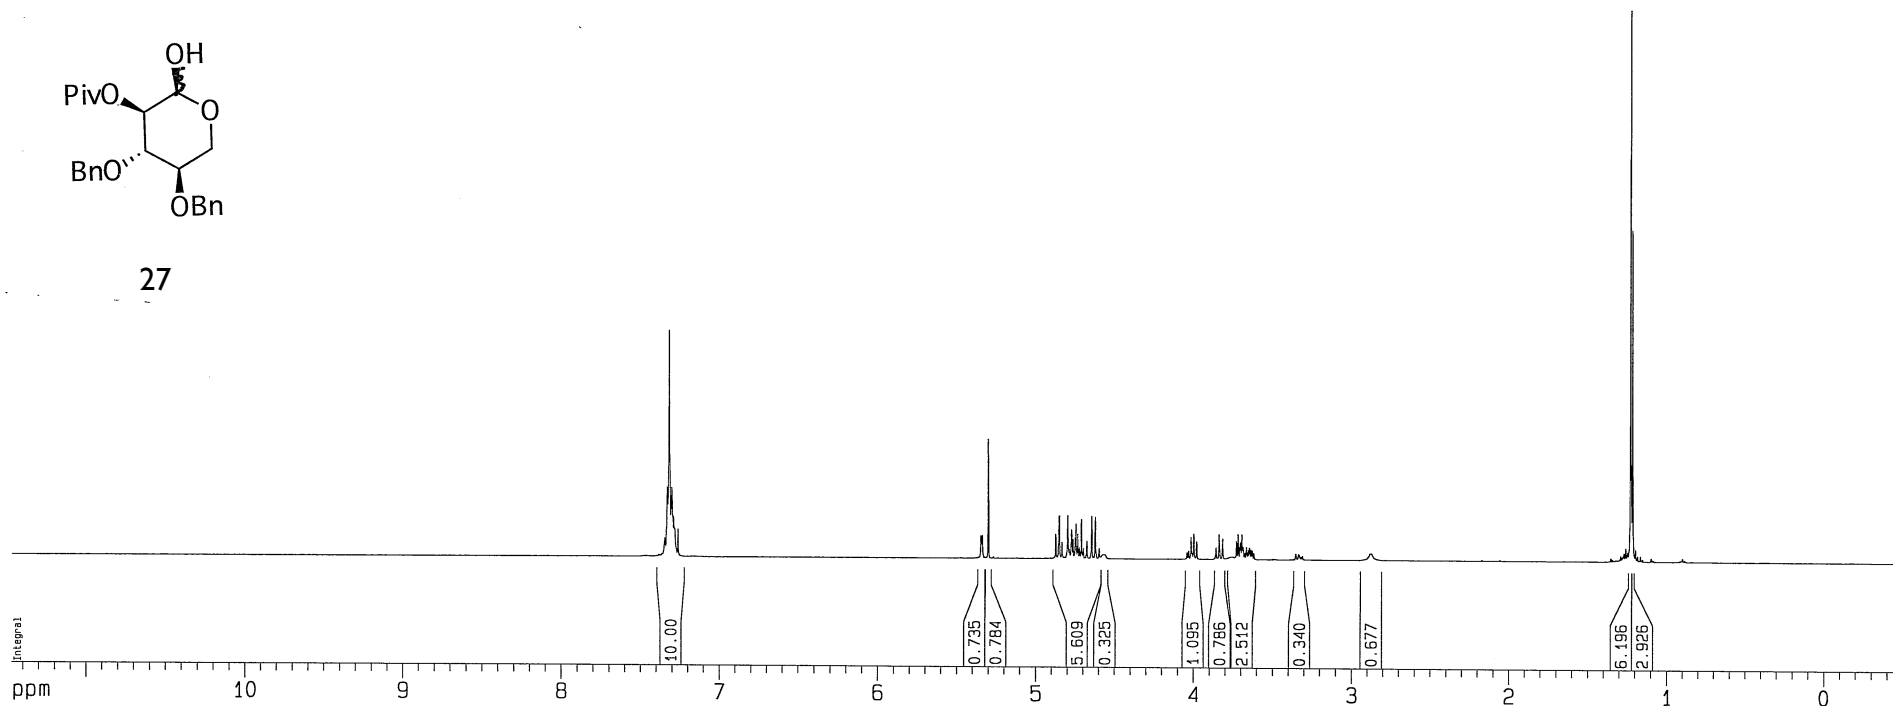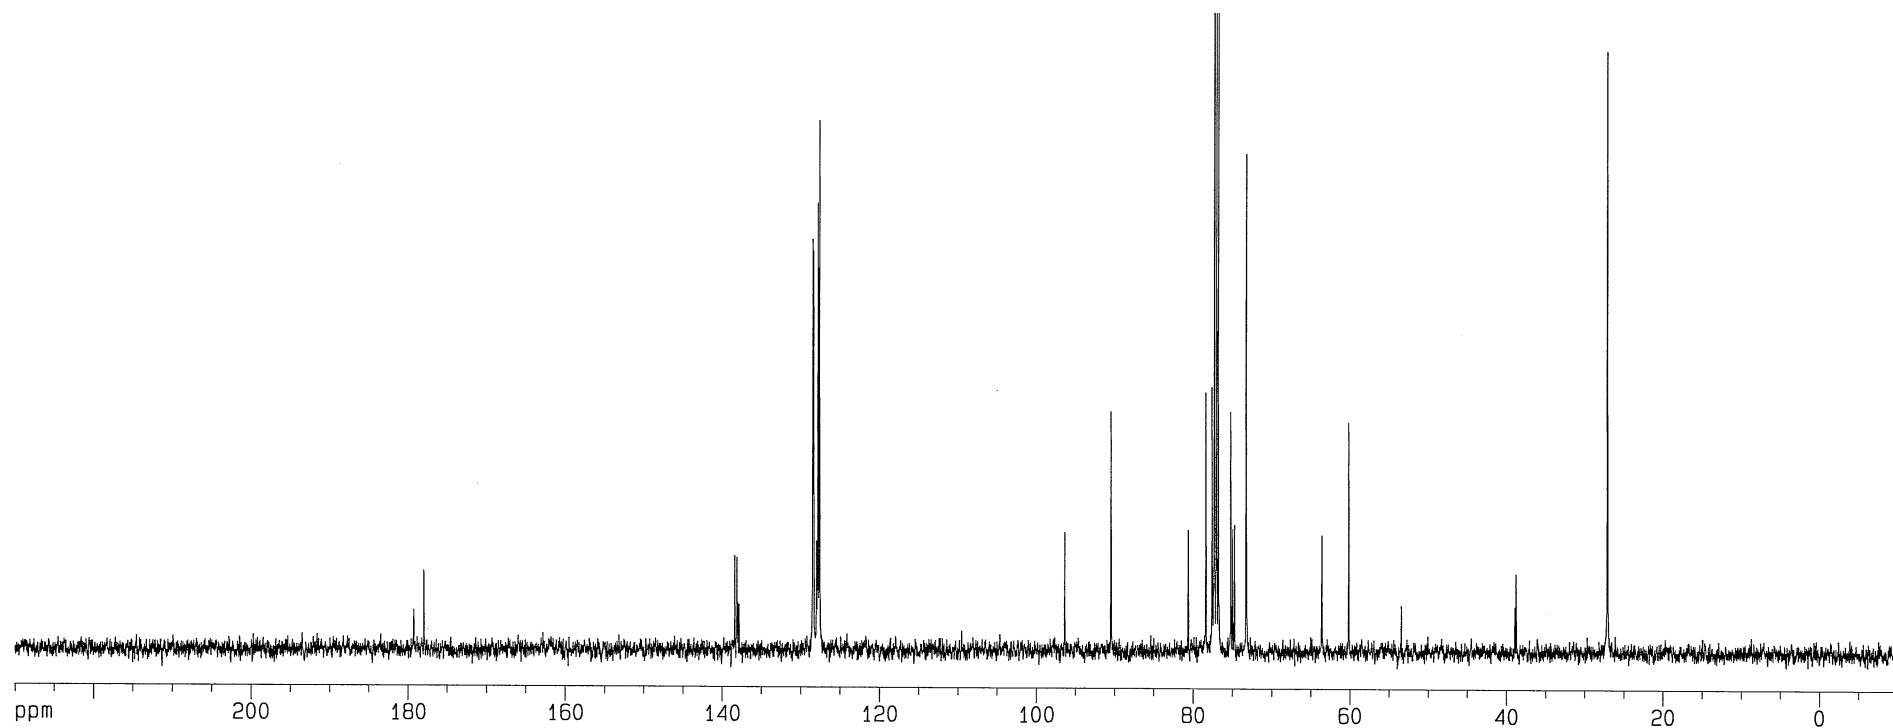

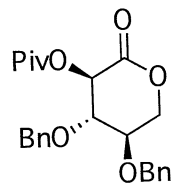

17

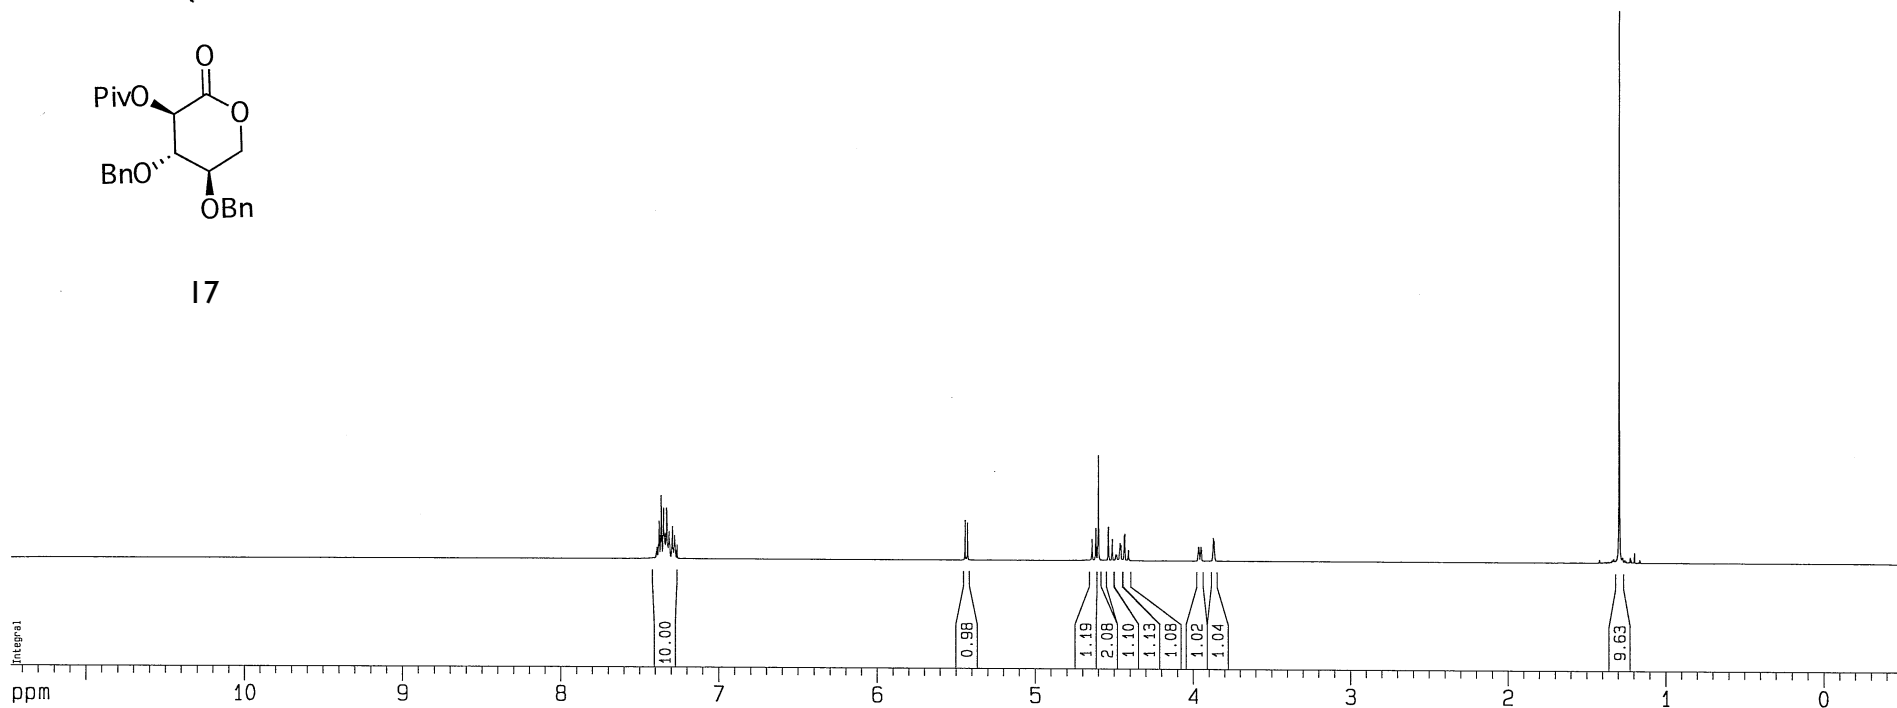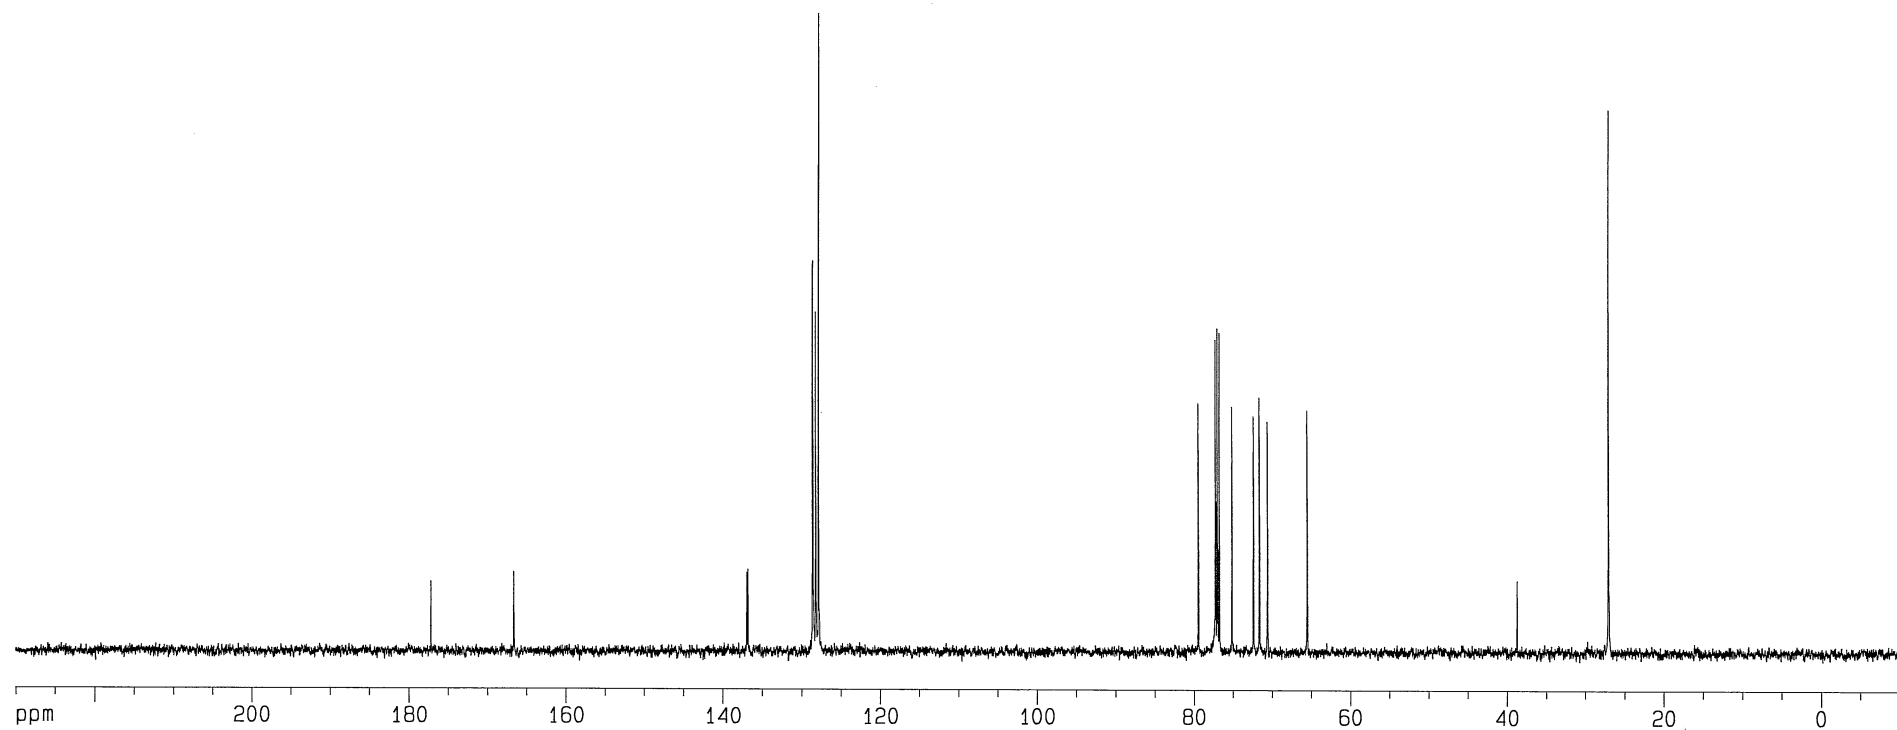

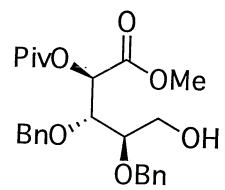

28

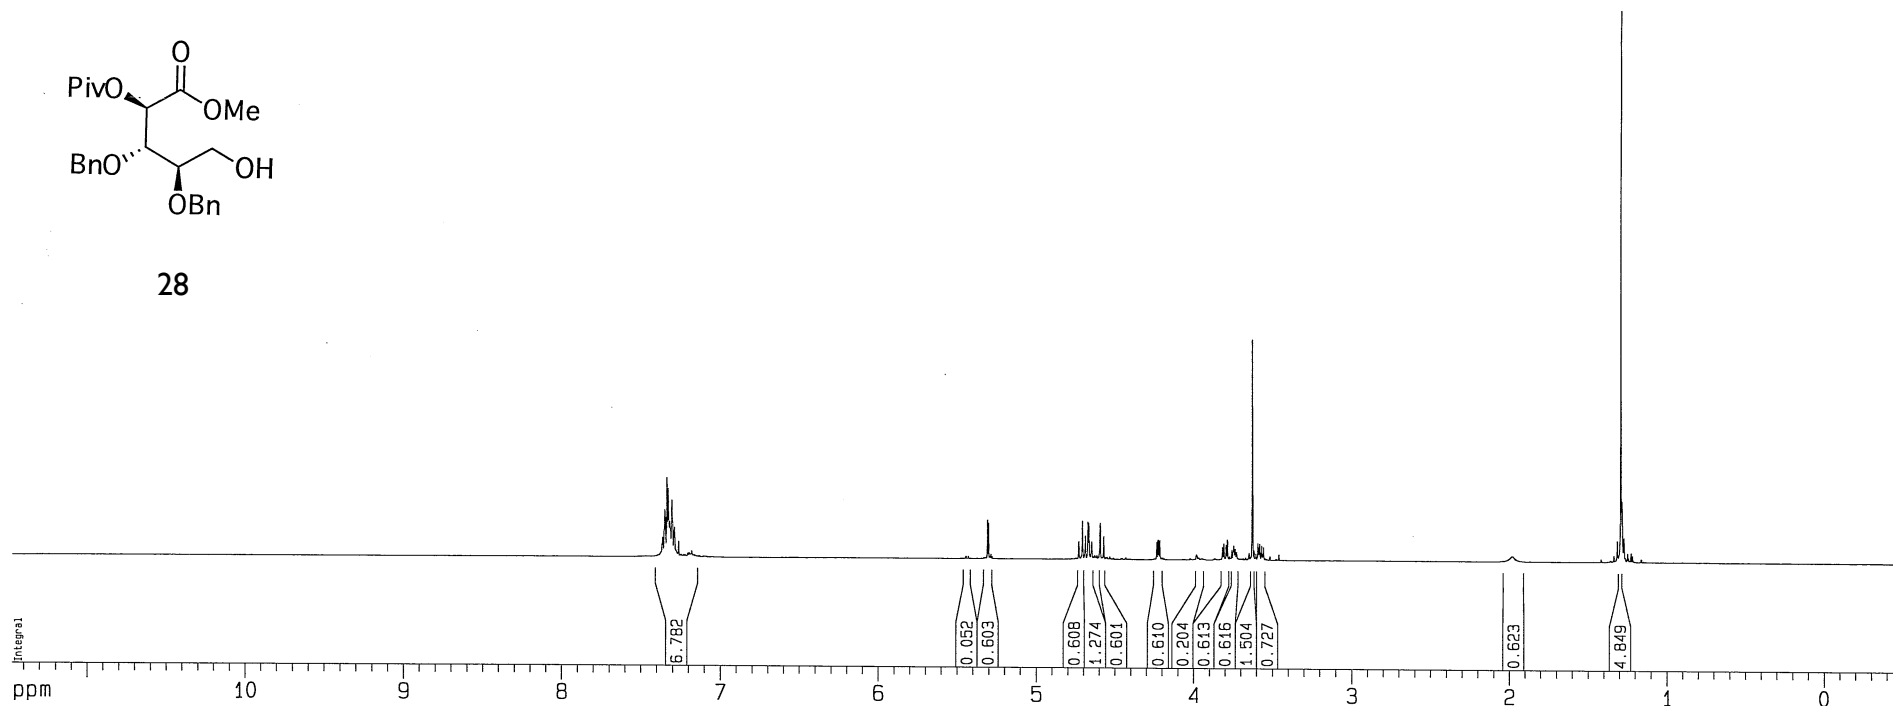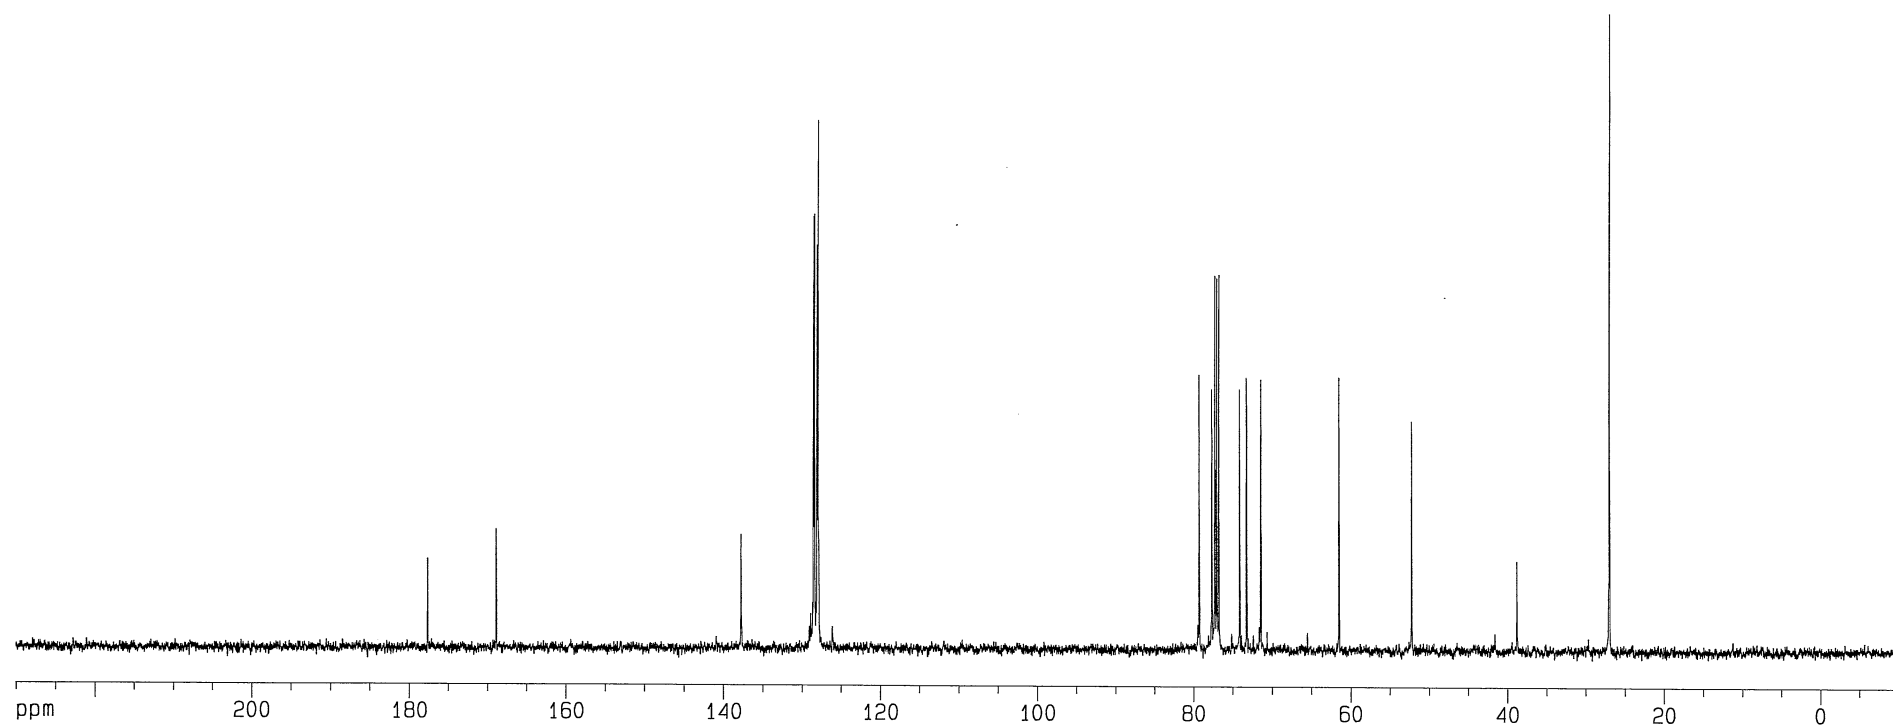

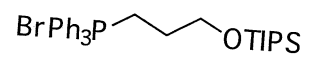

30

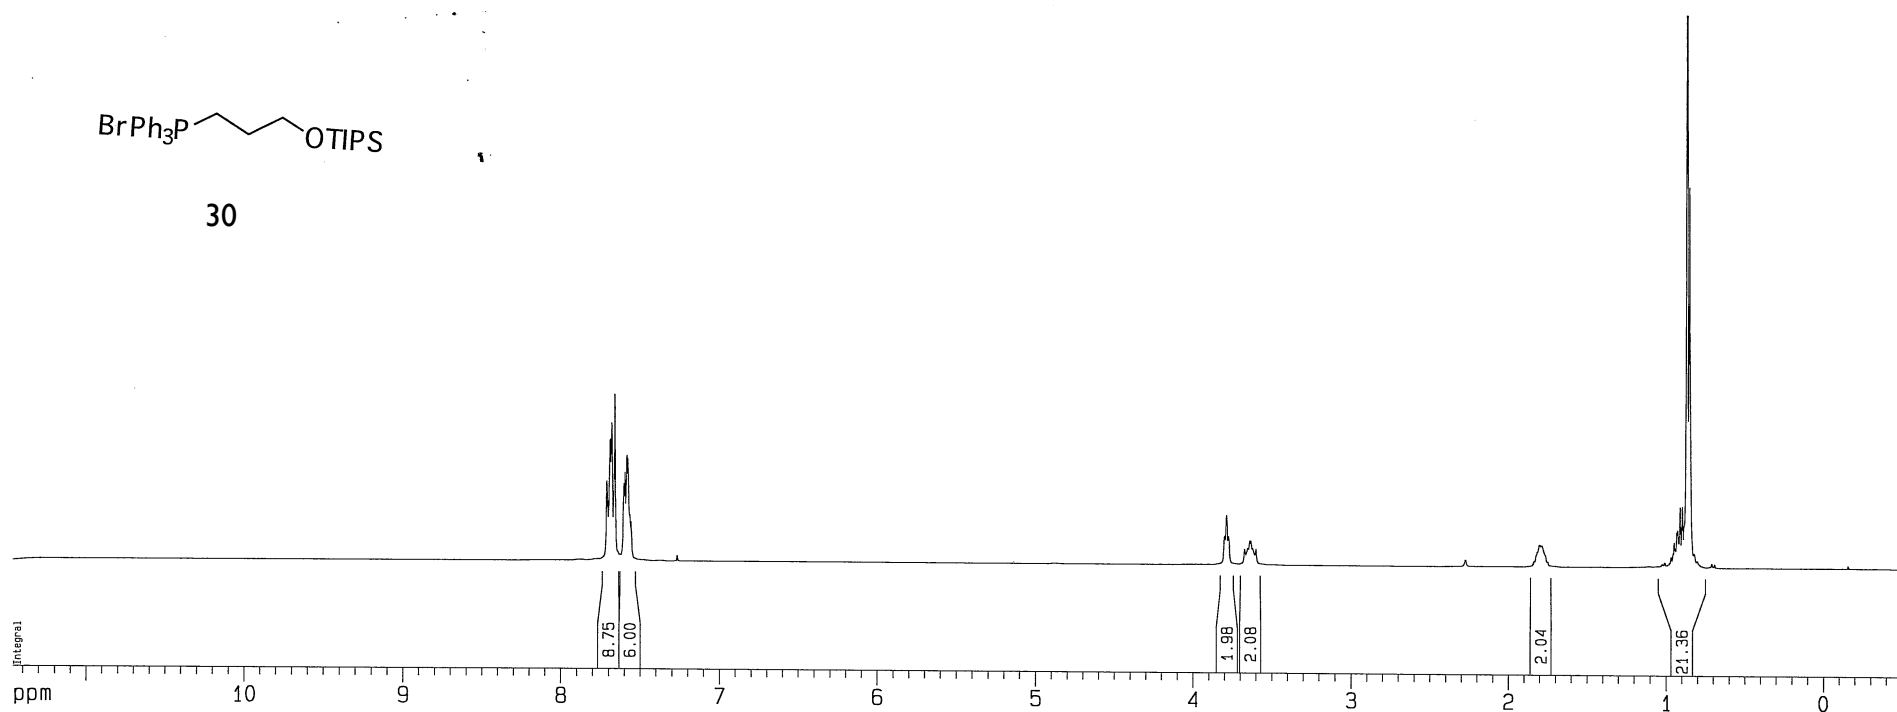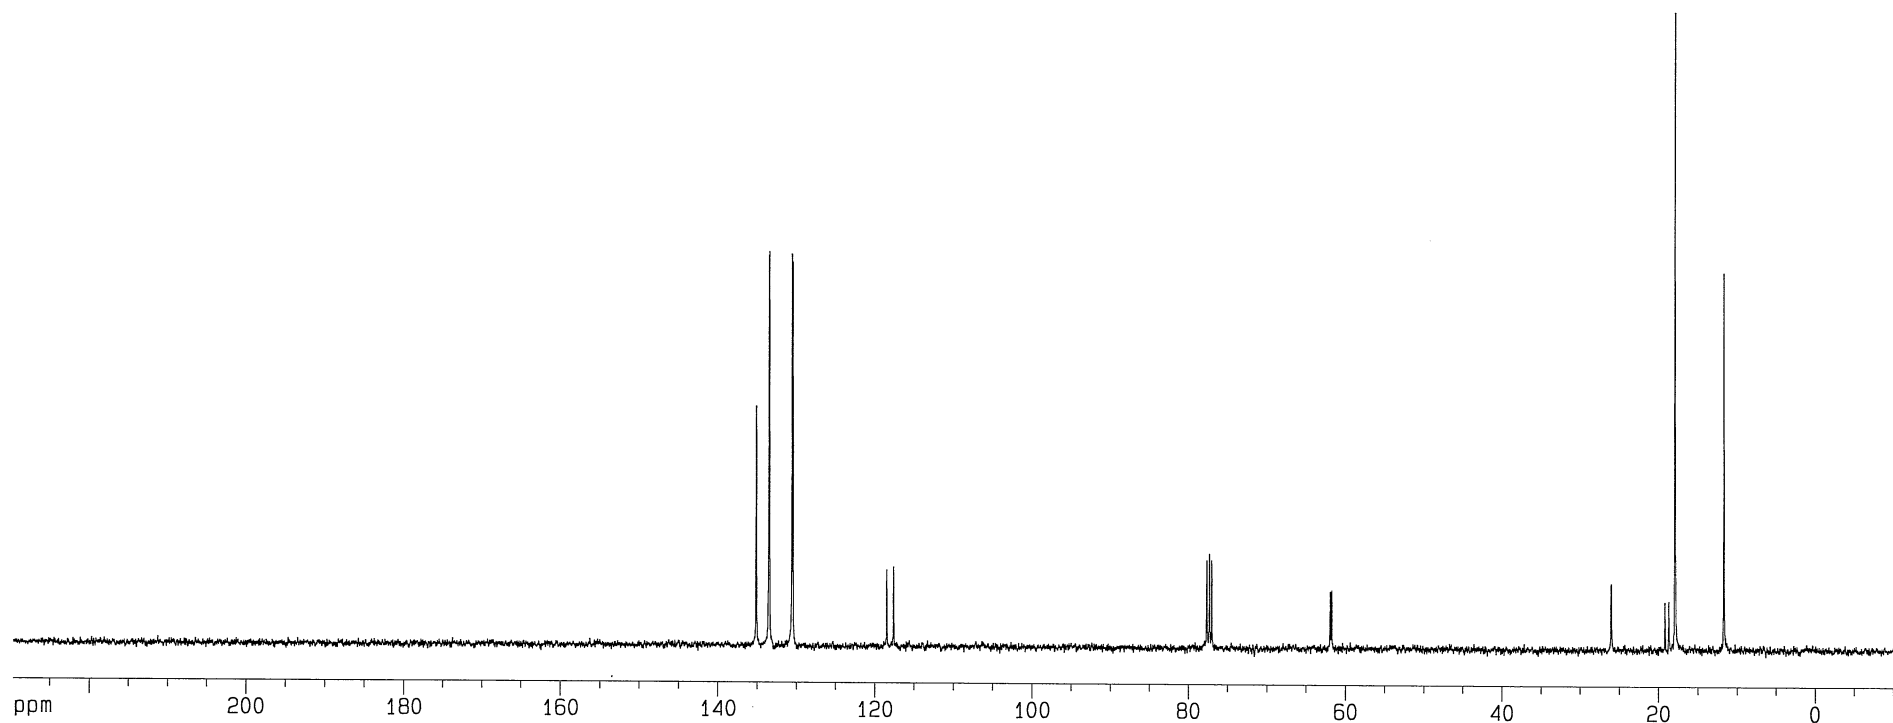

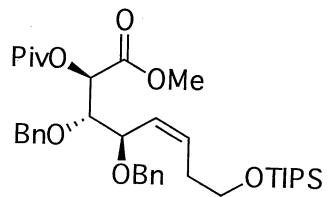

18

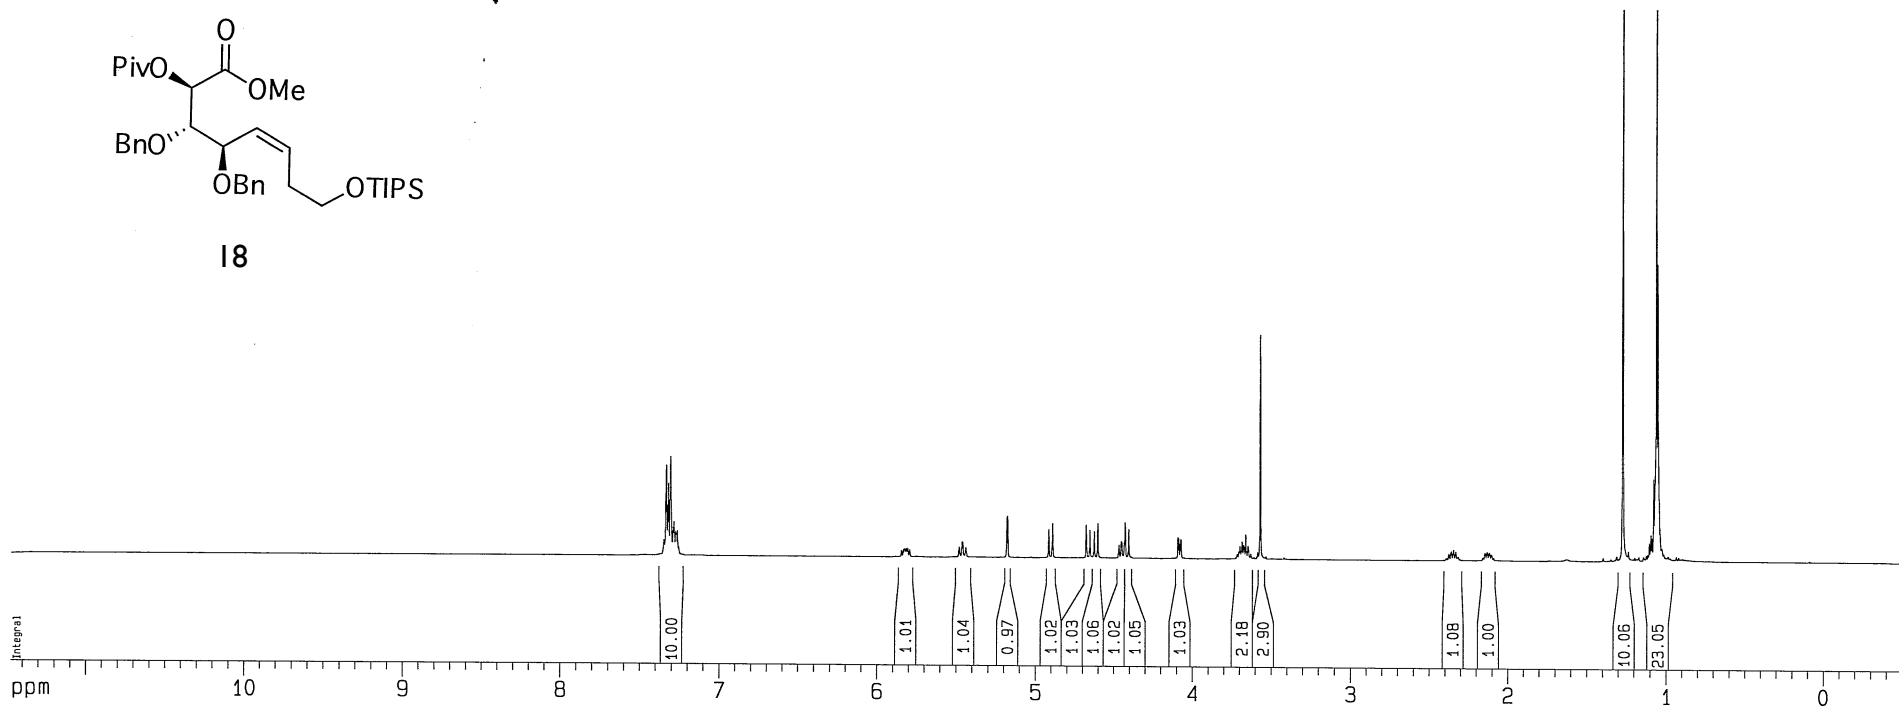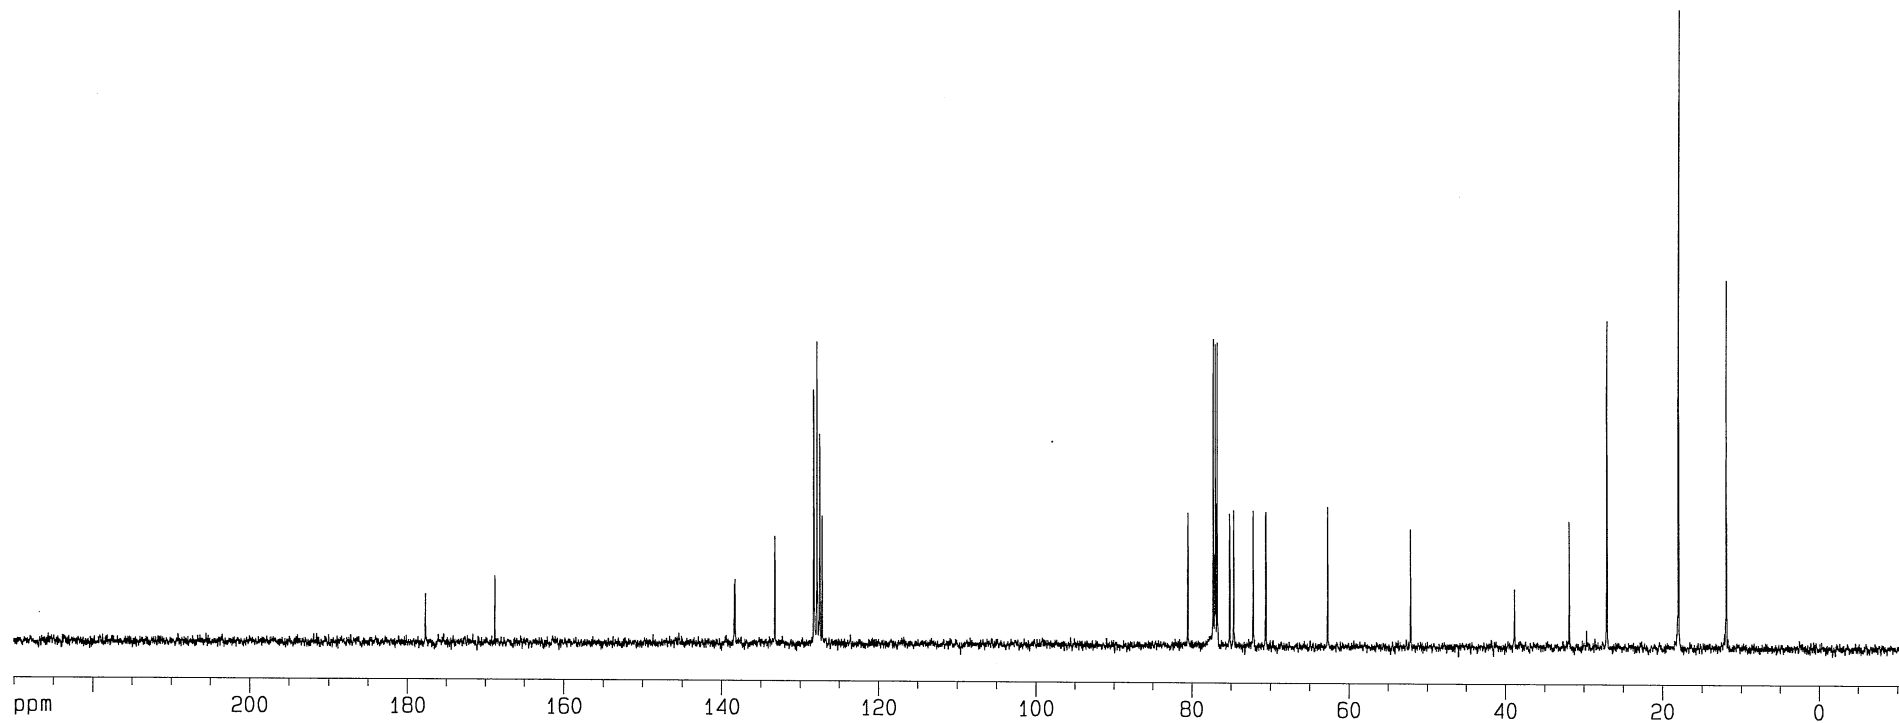



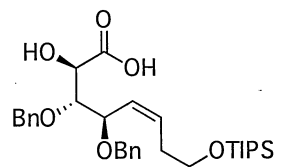

32

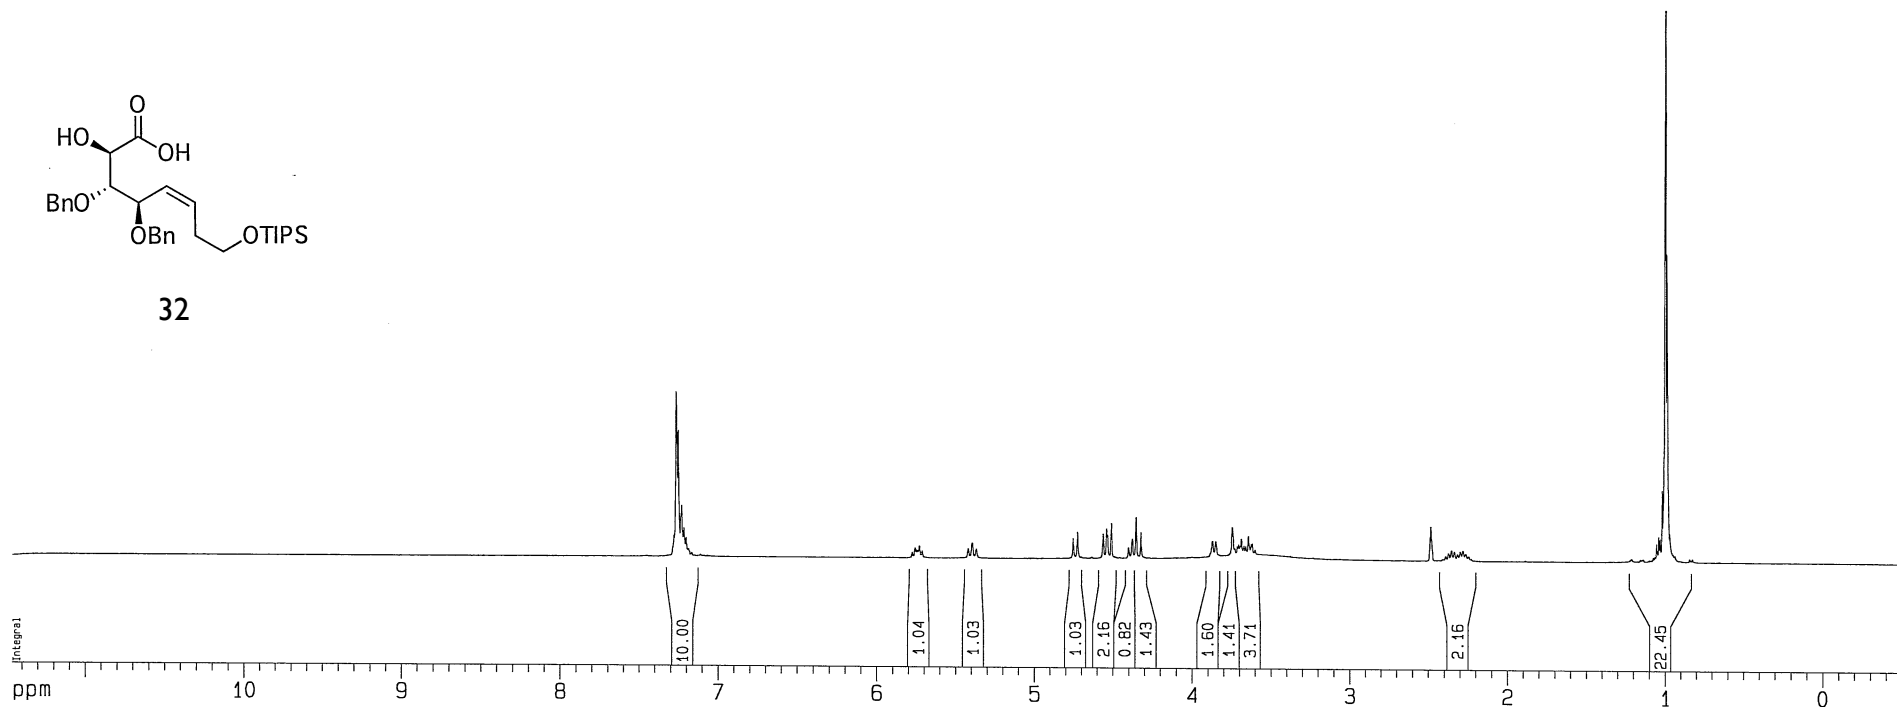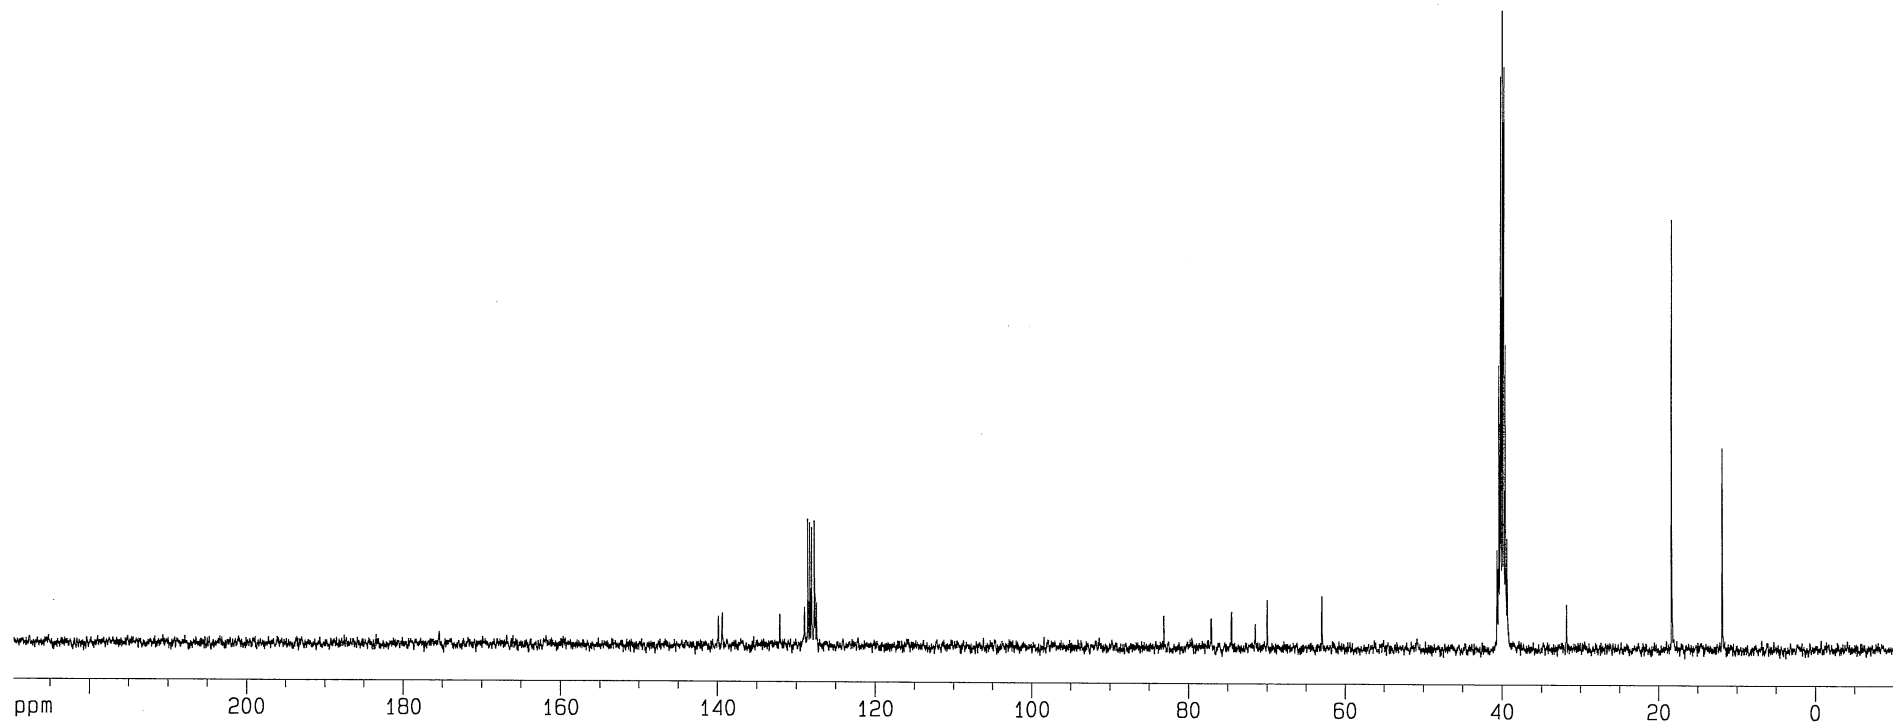



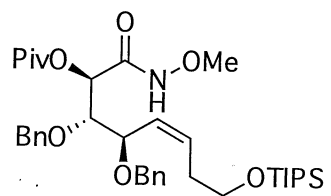

19

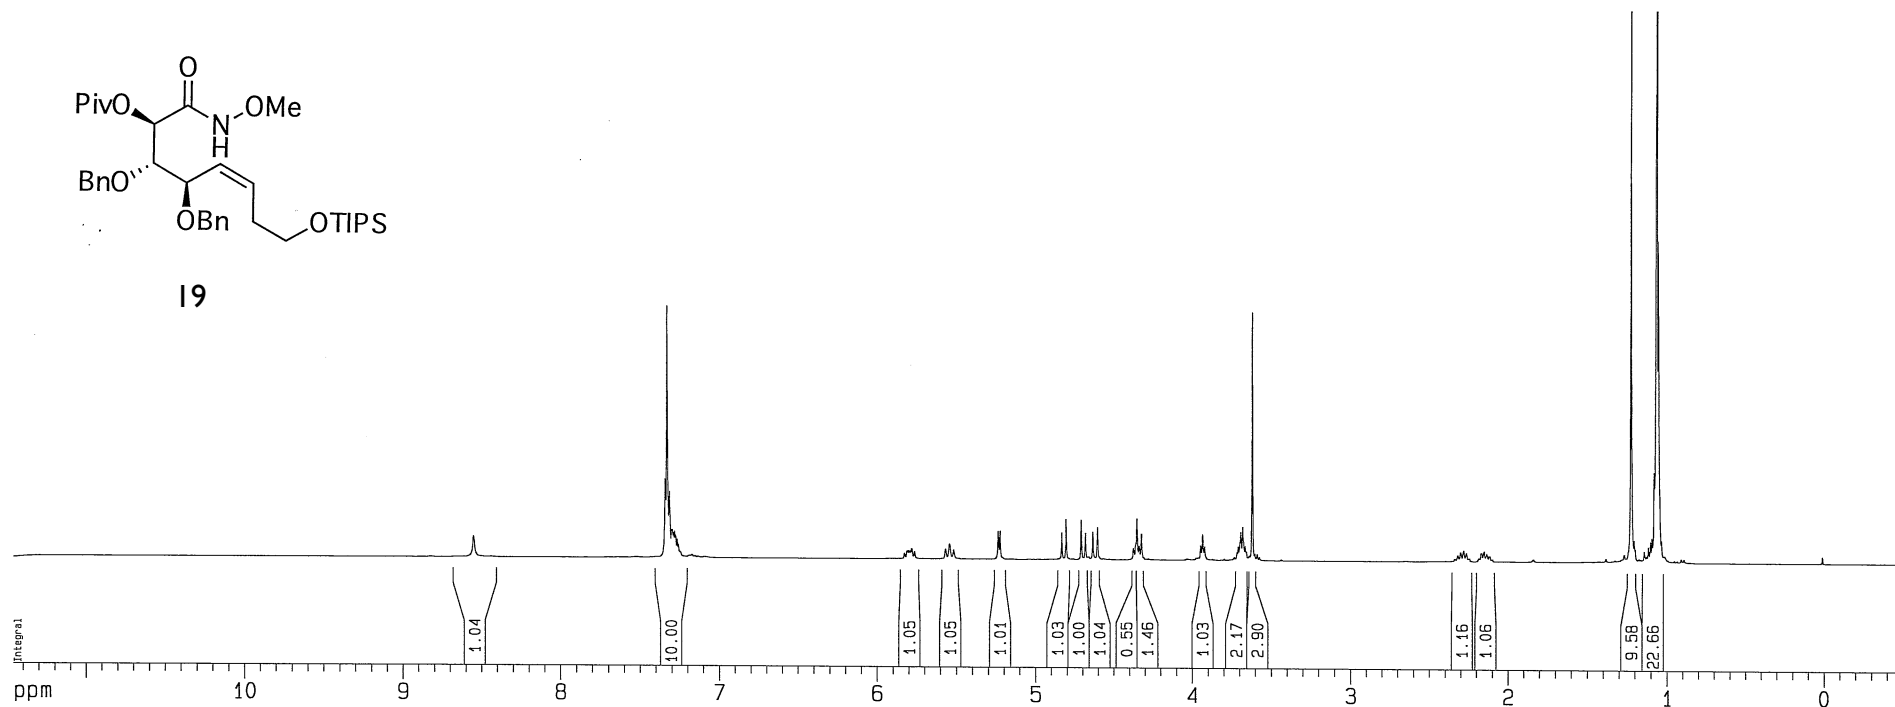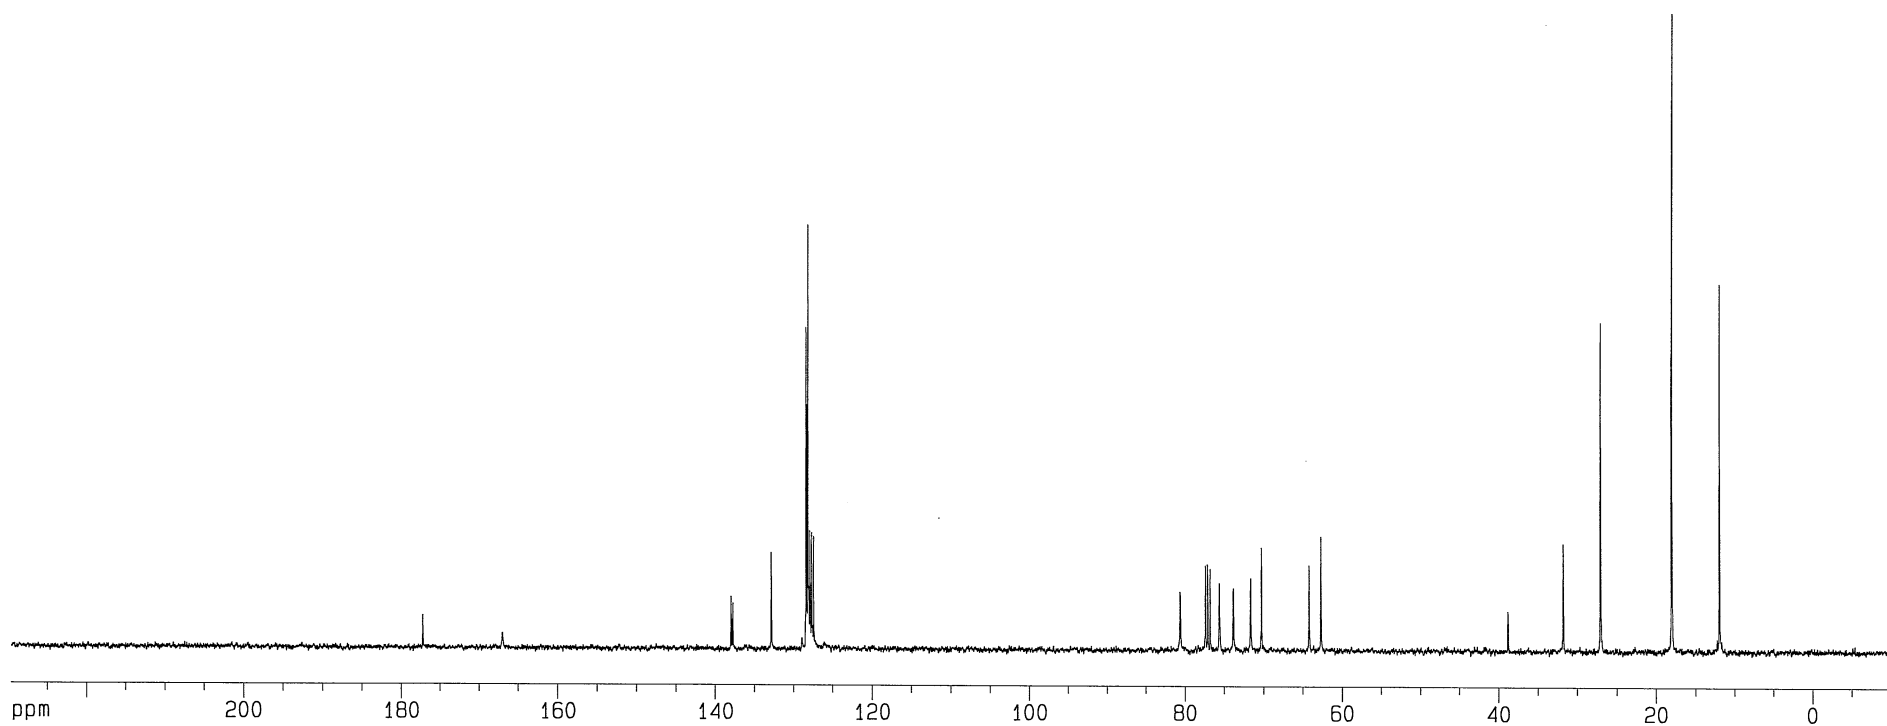

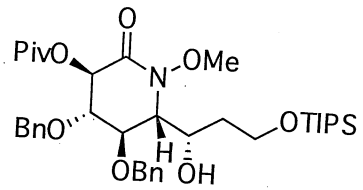

21

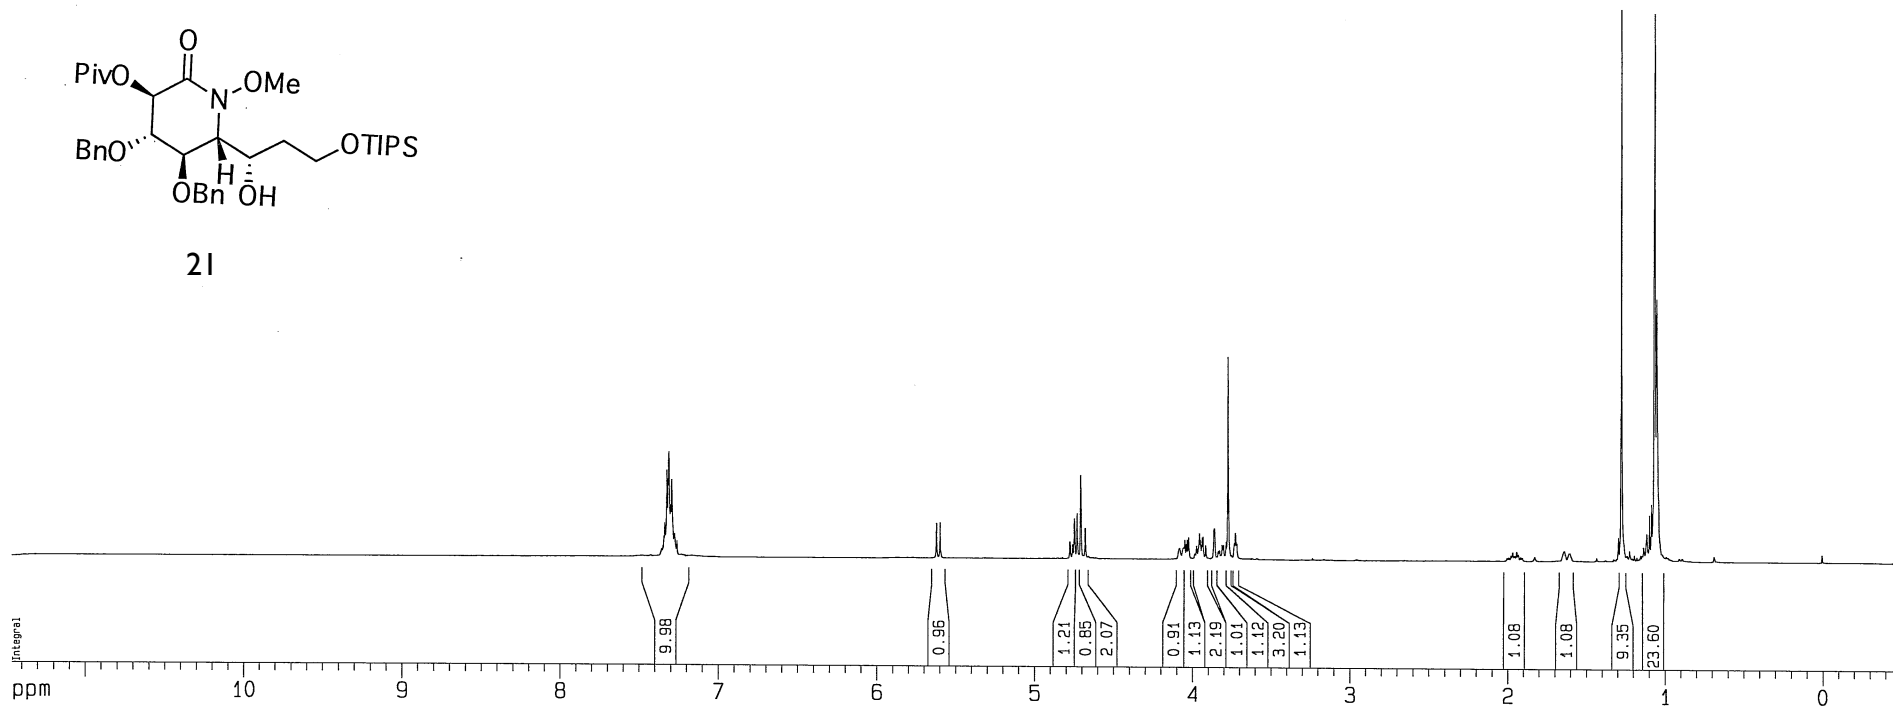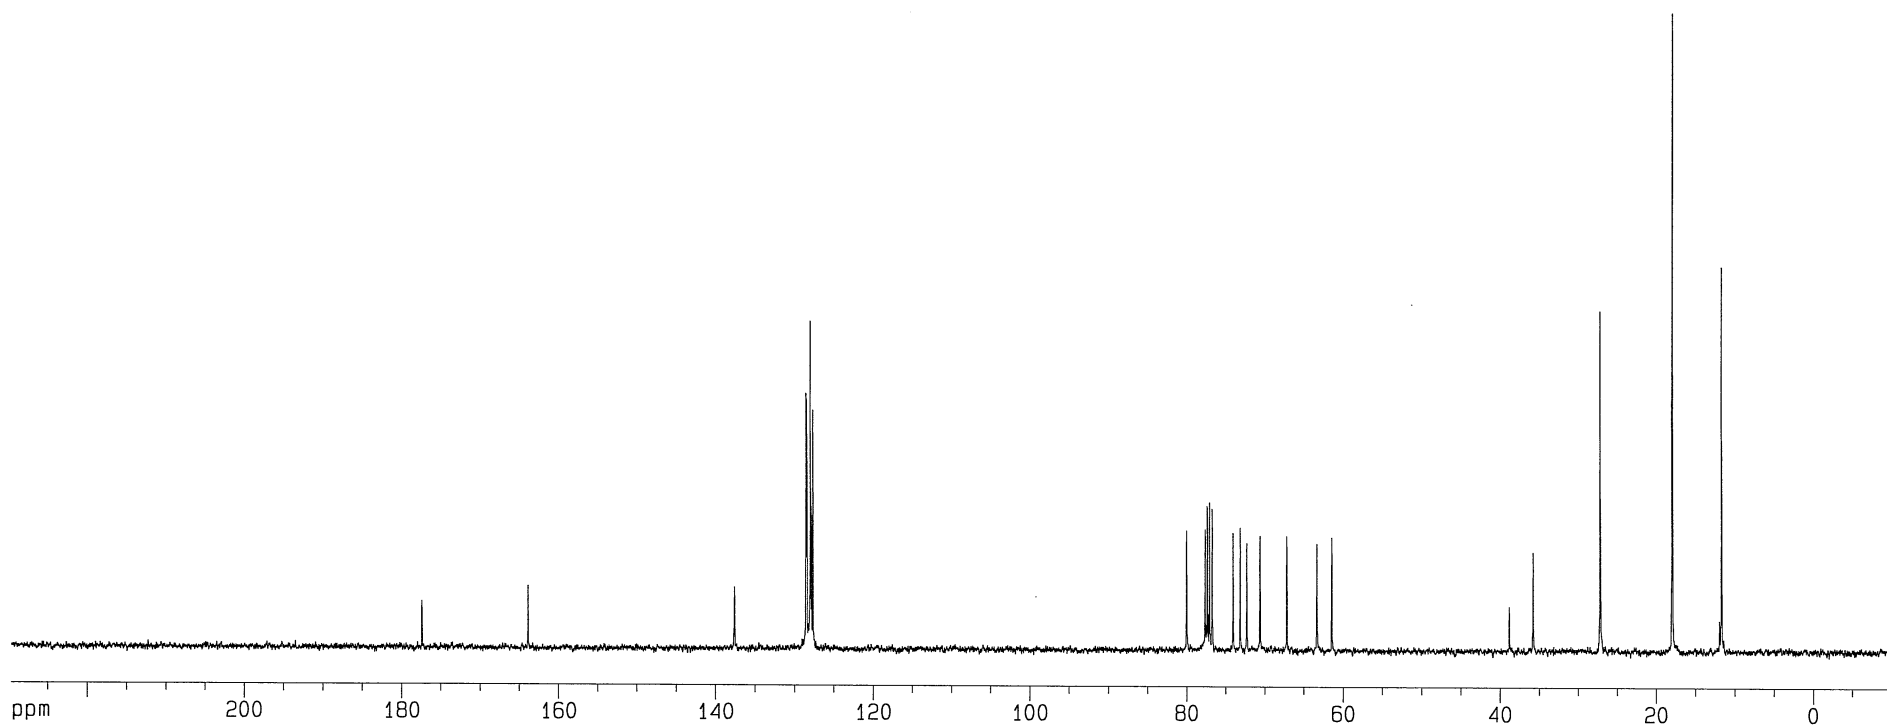

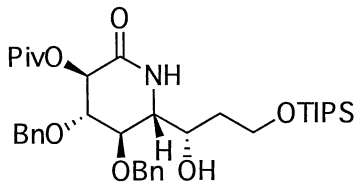

33

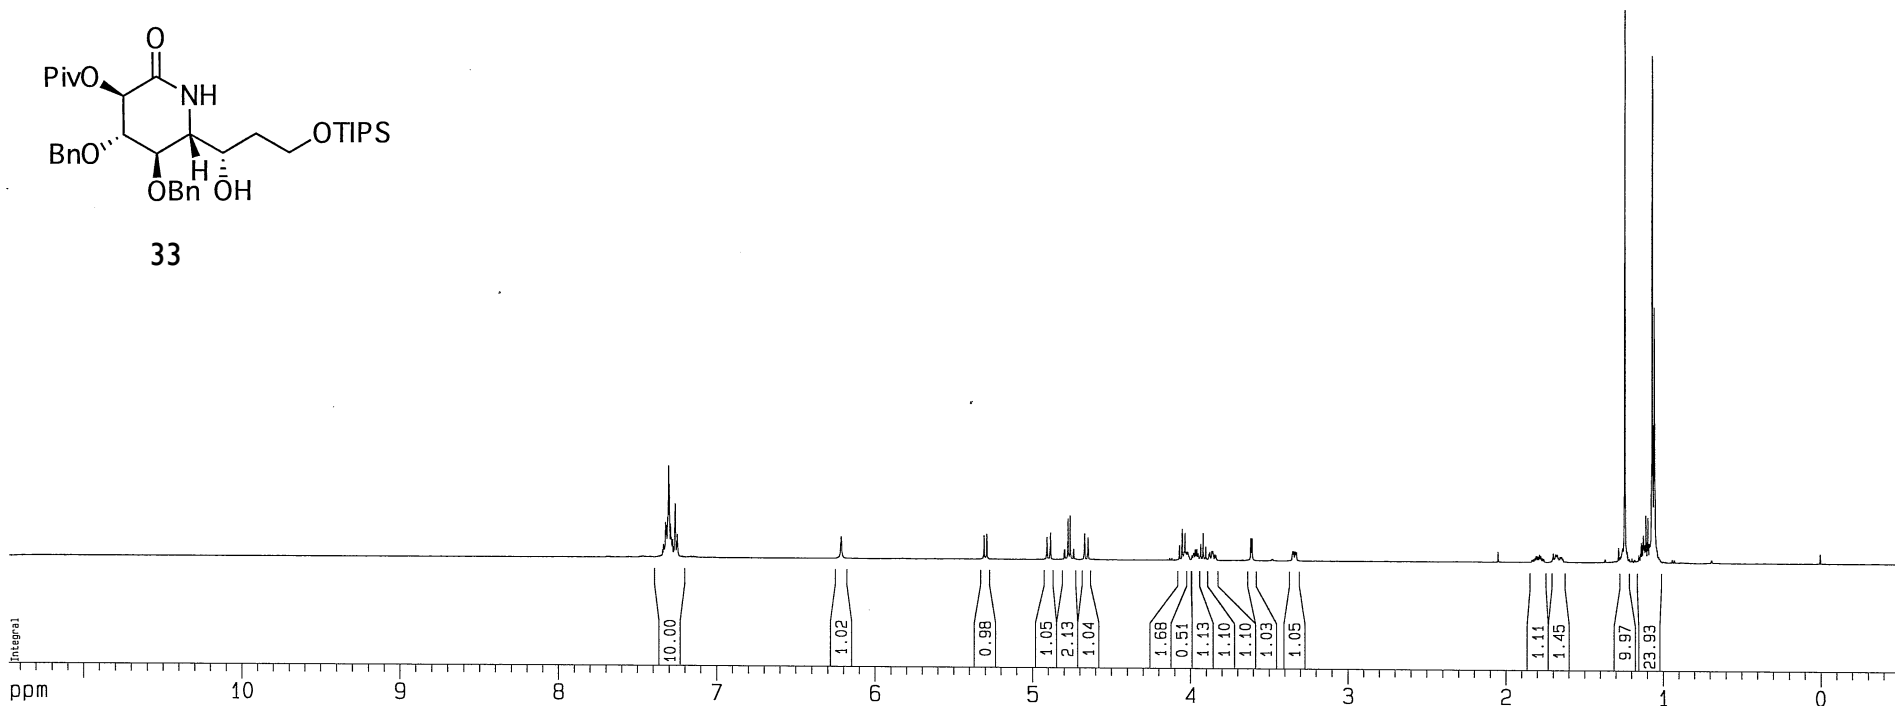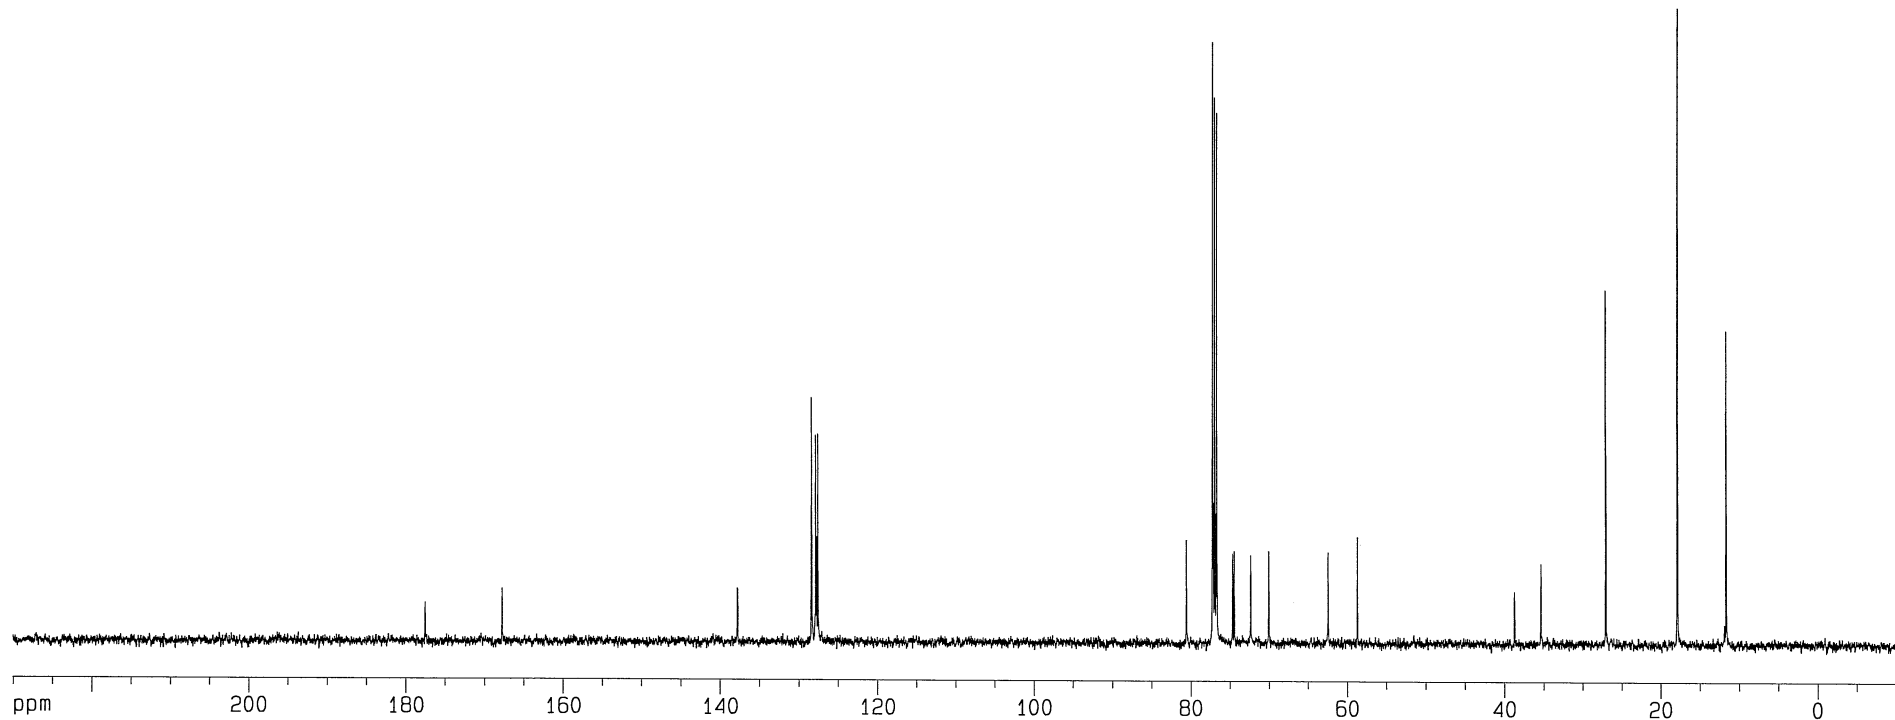

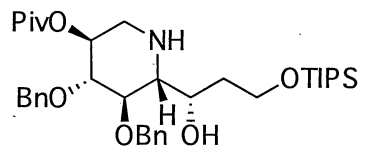

22

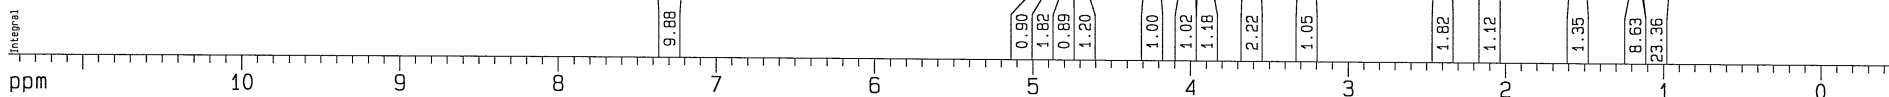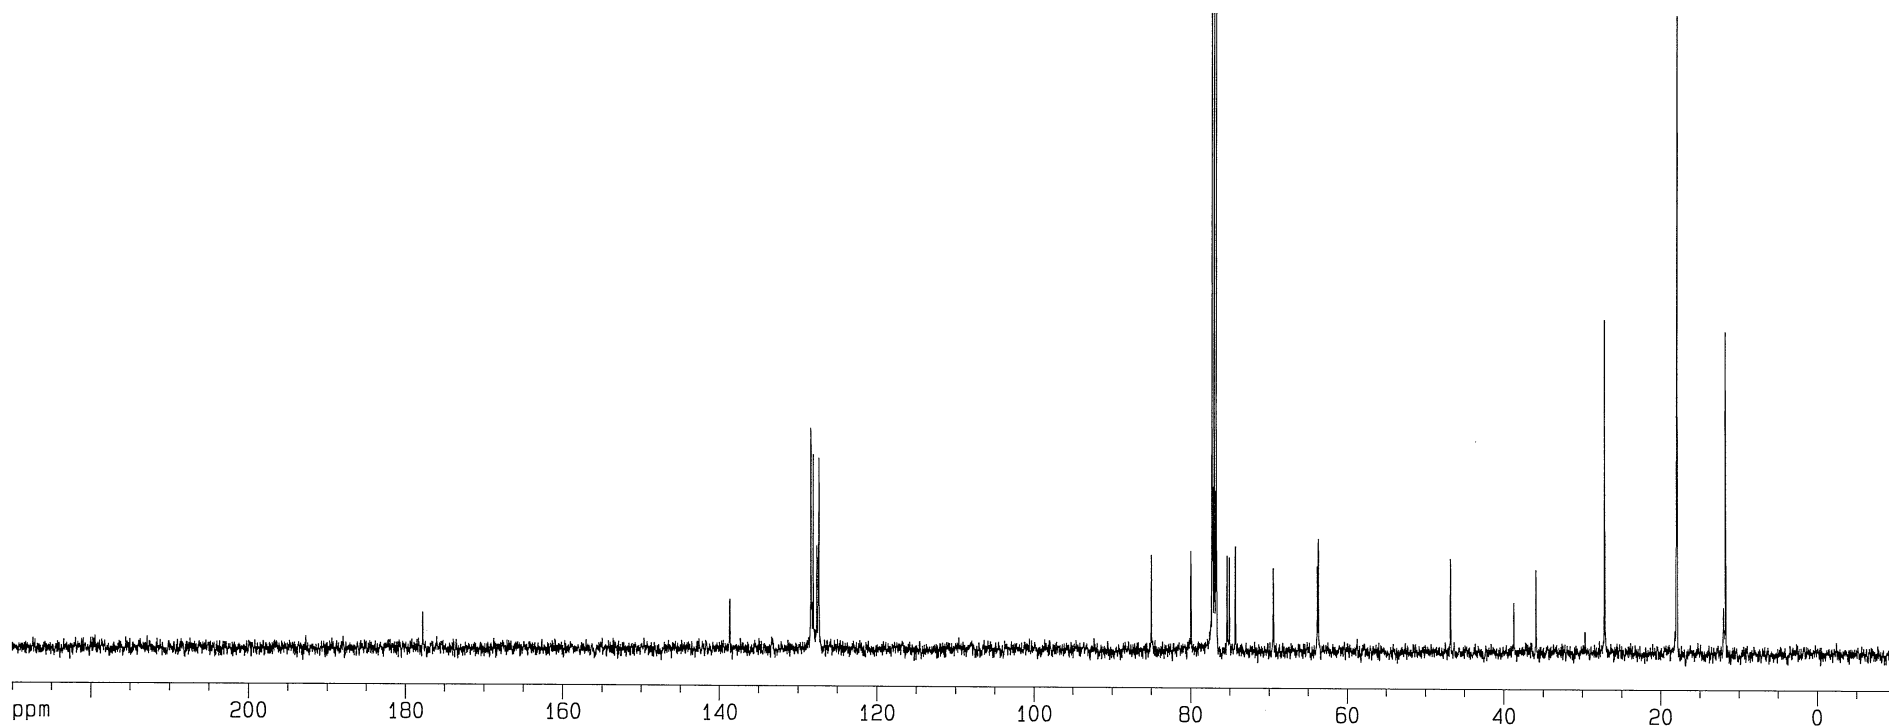

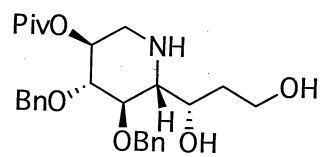

34

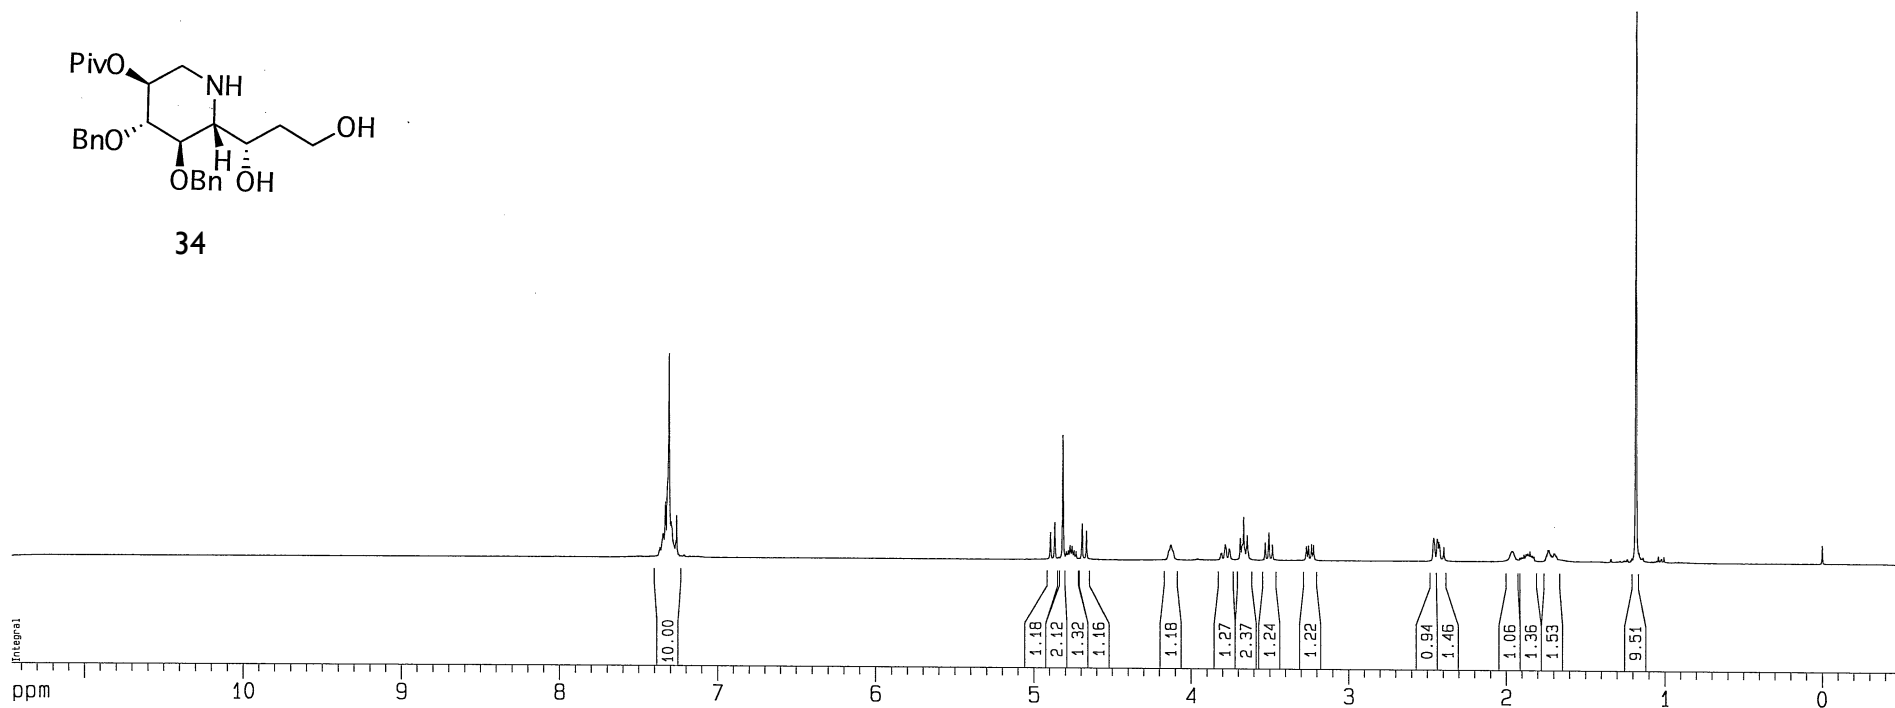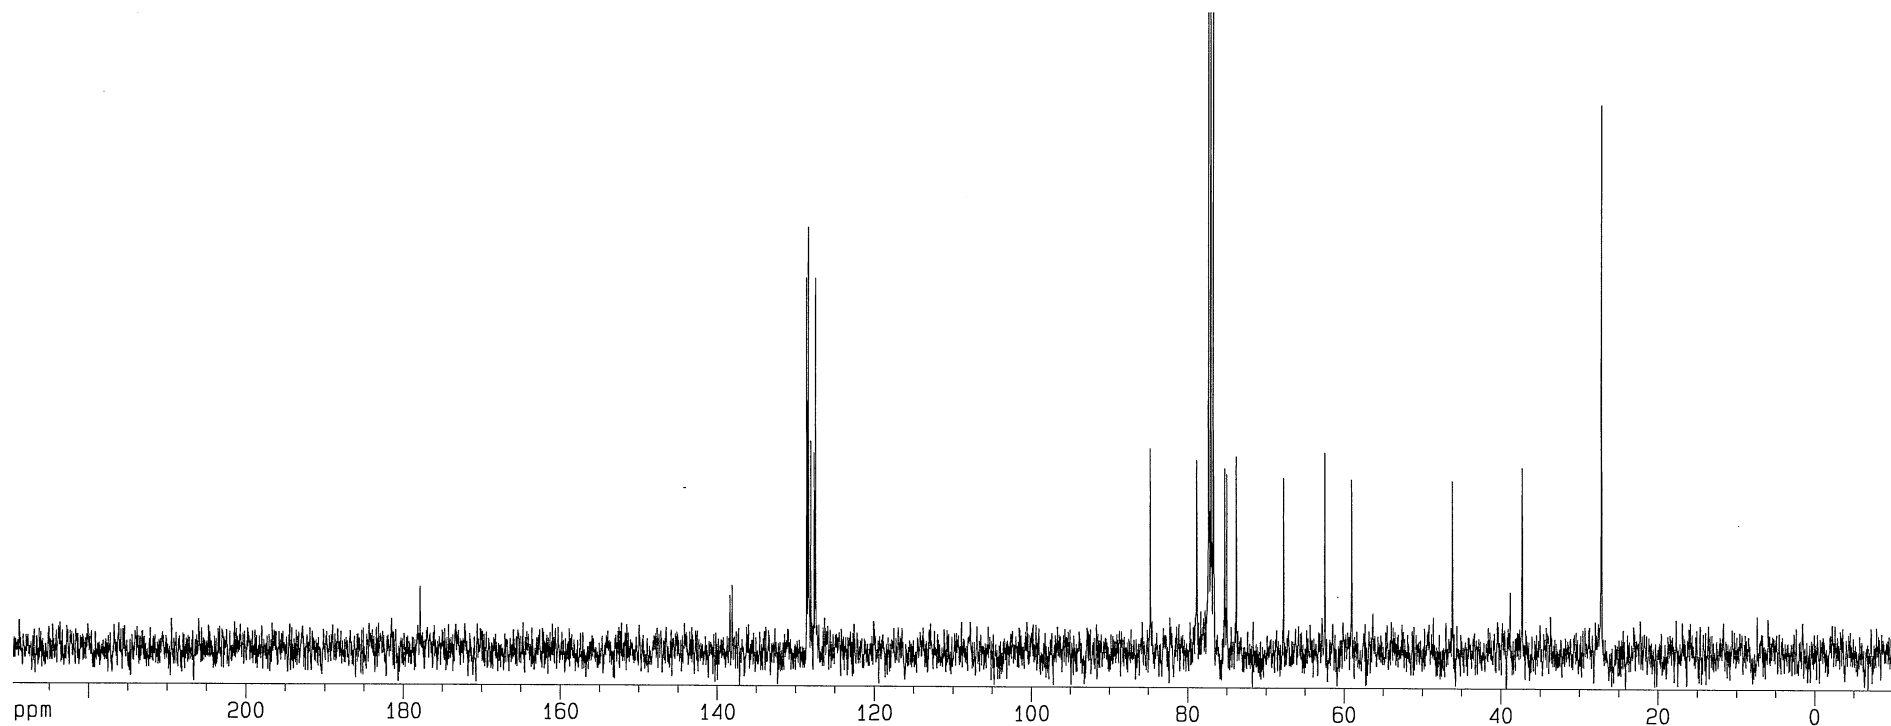

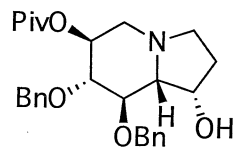

23

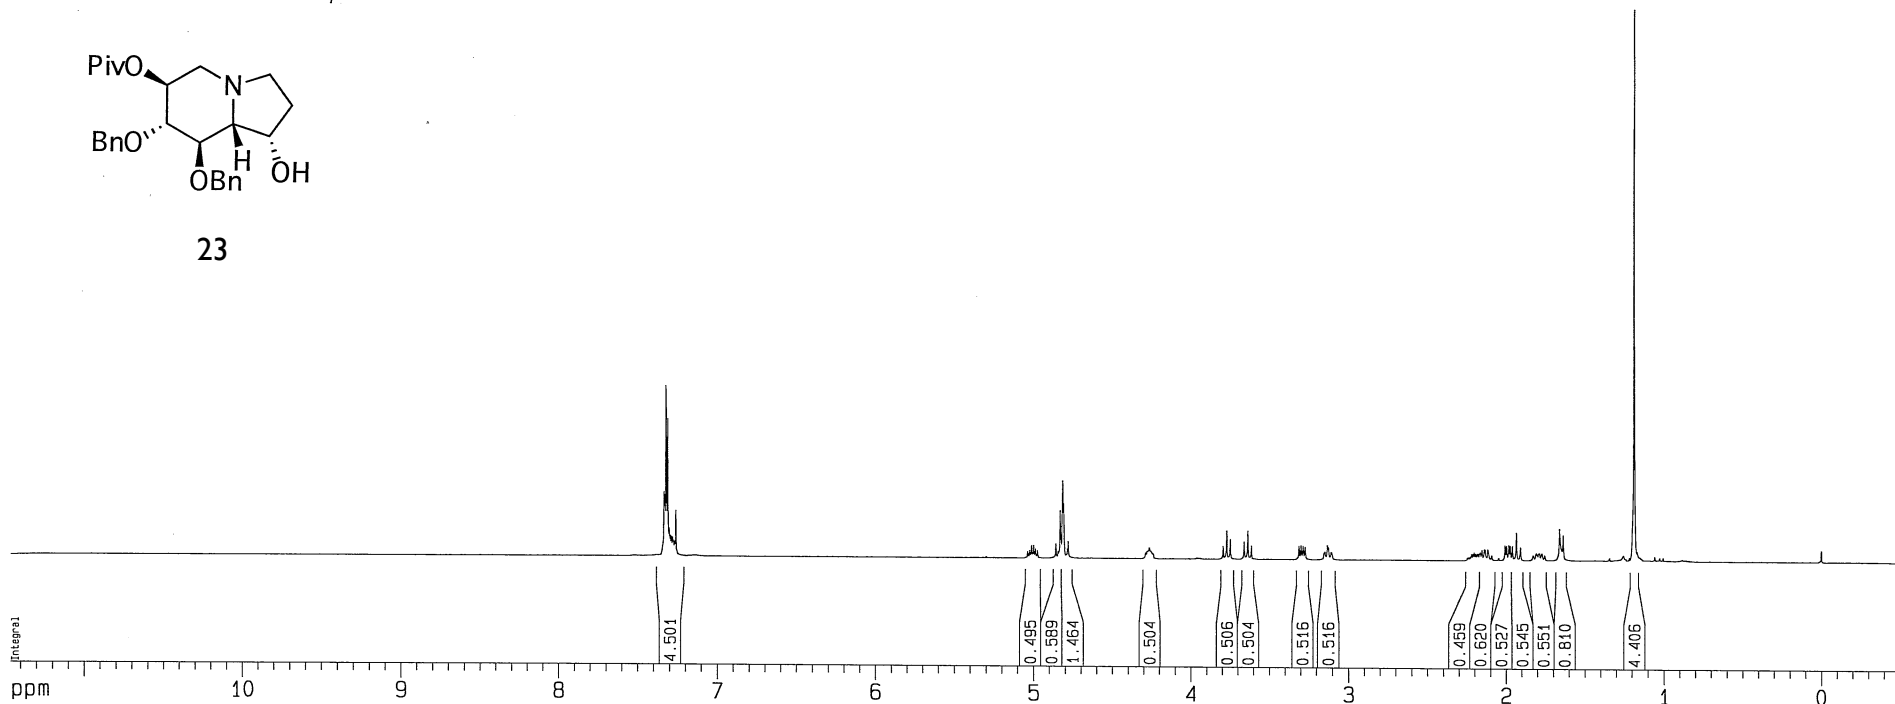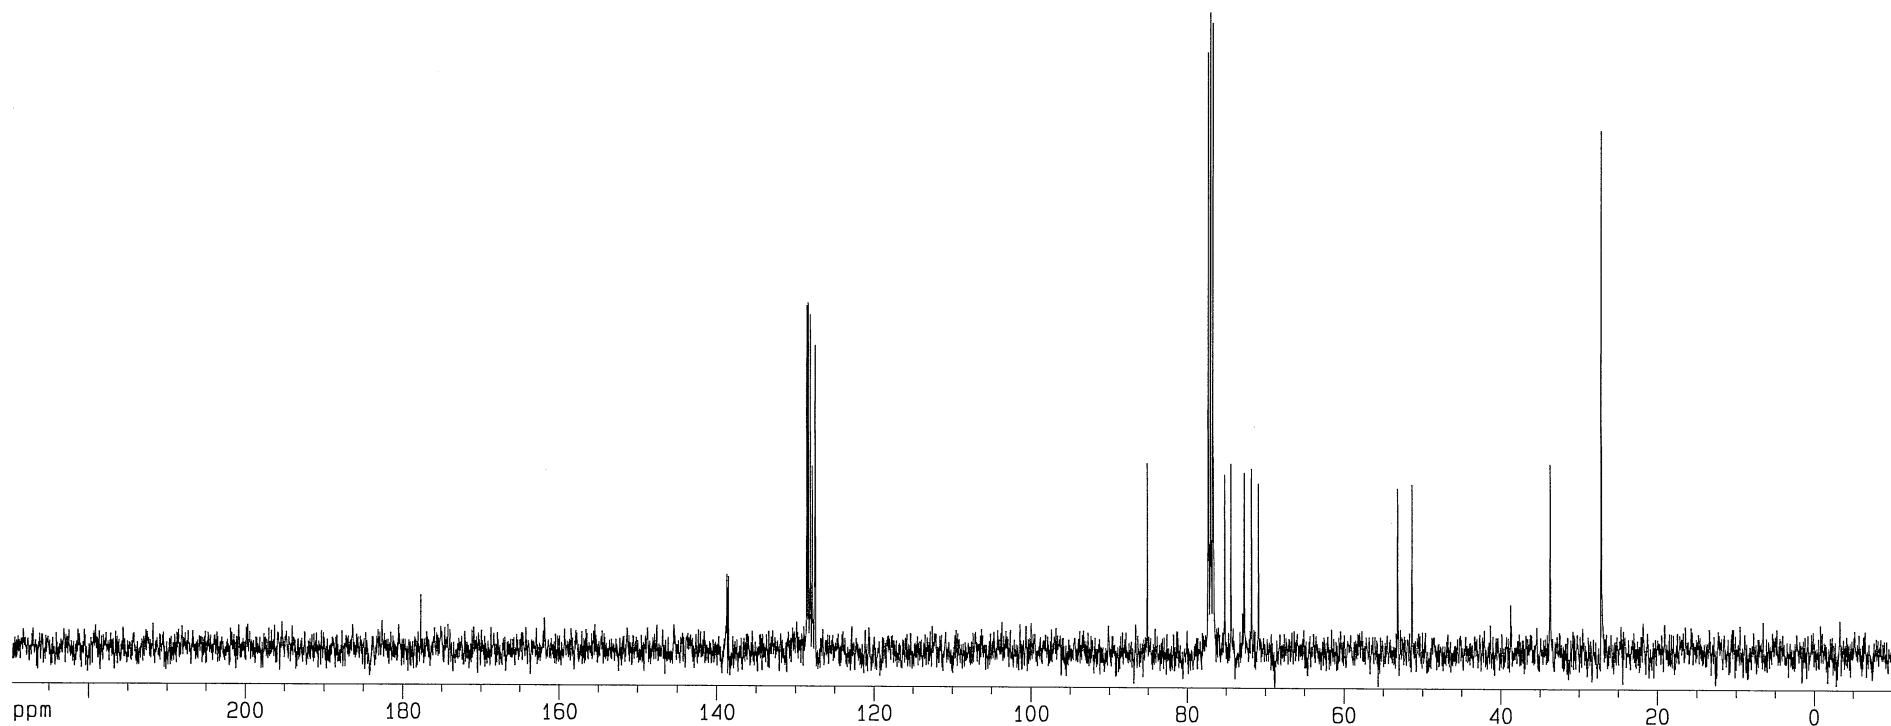

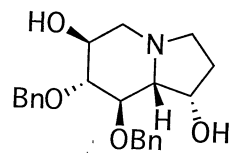

35

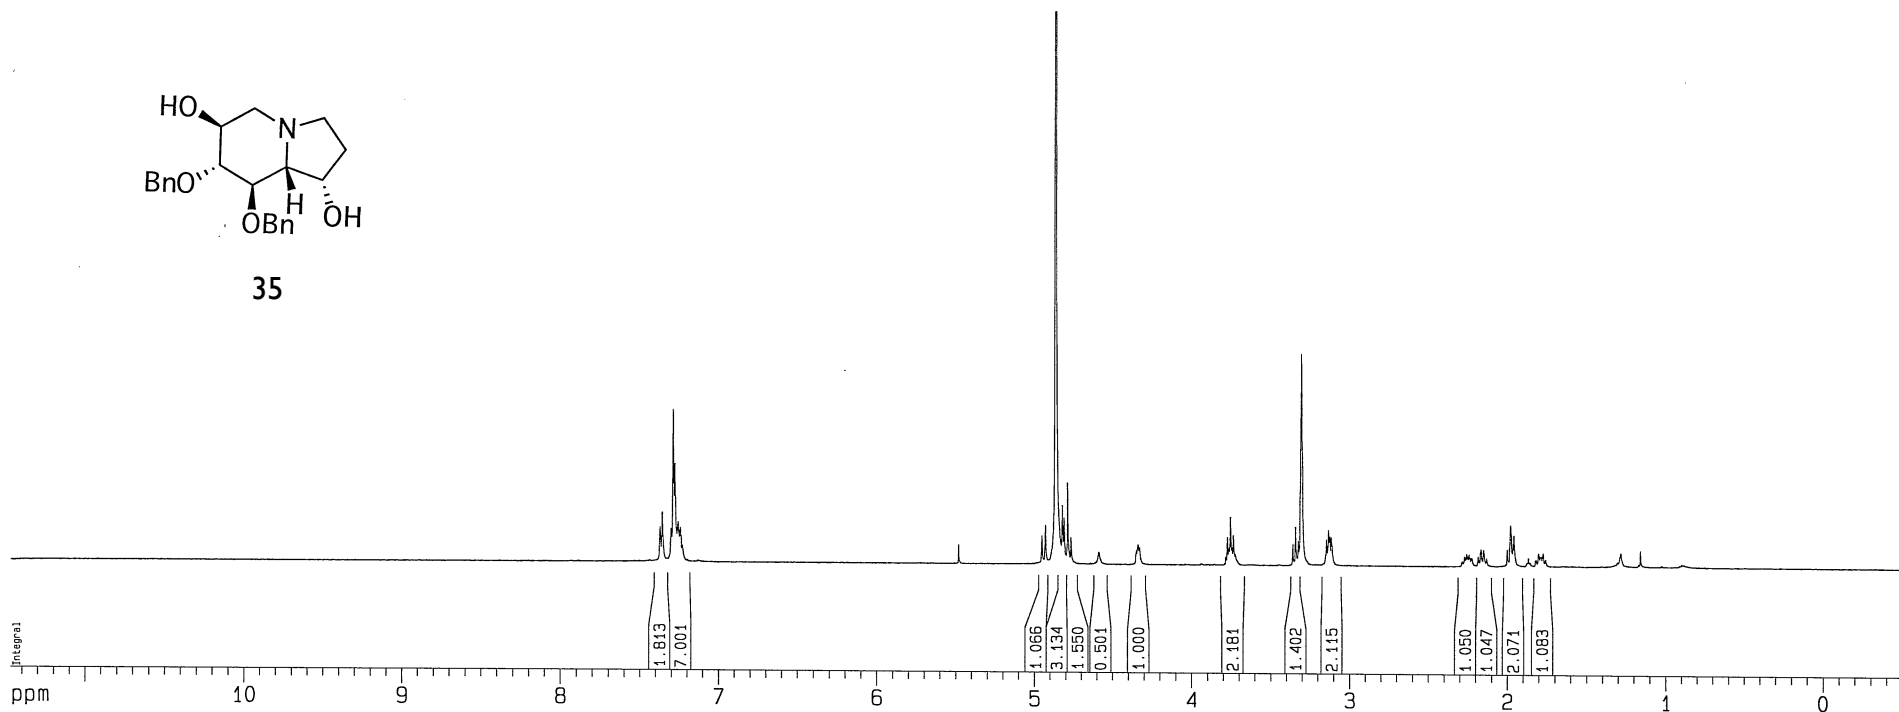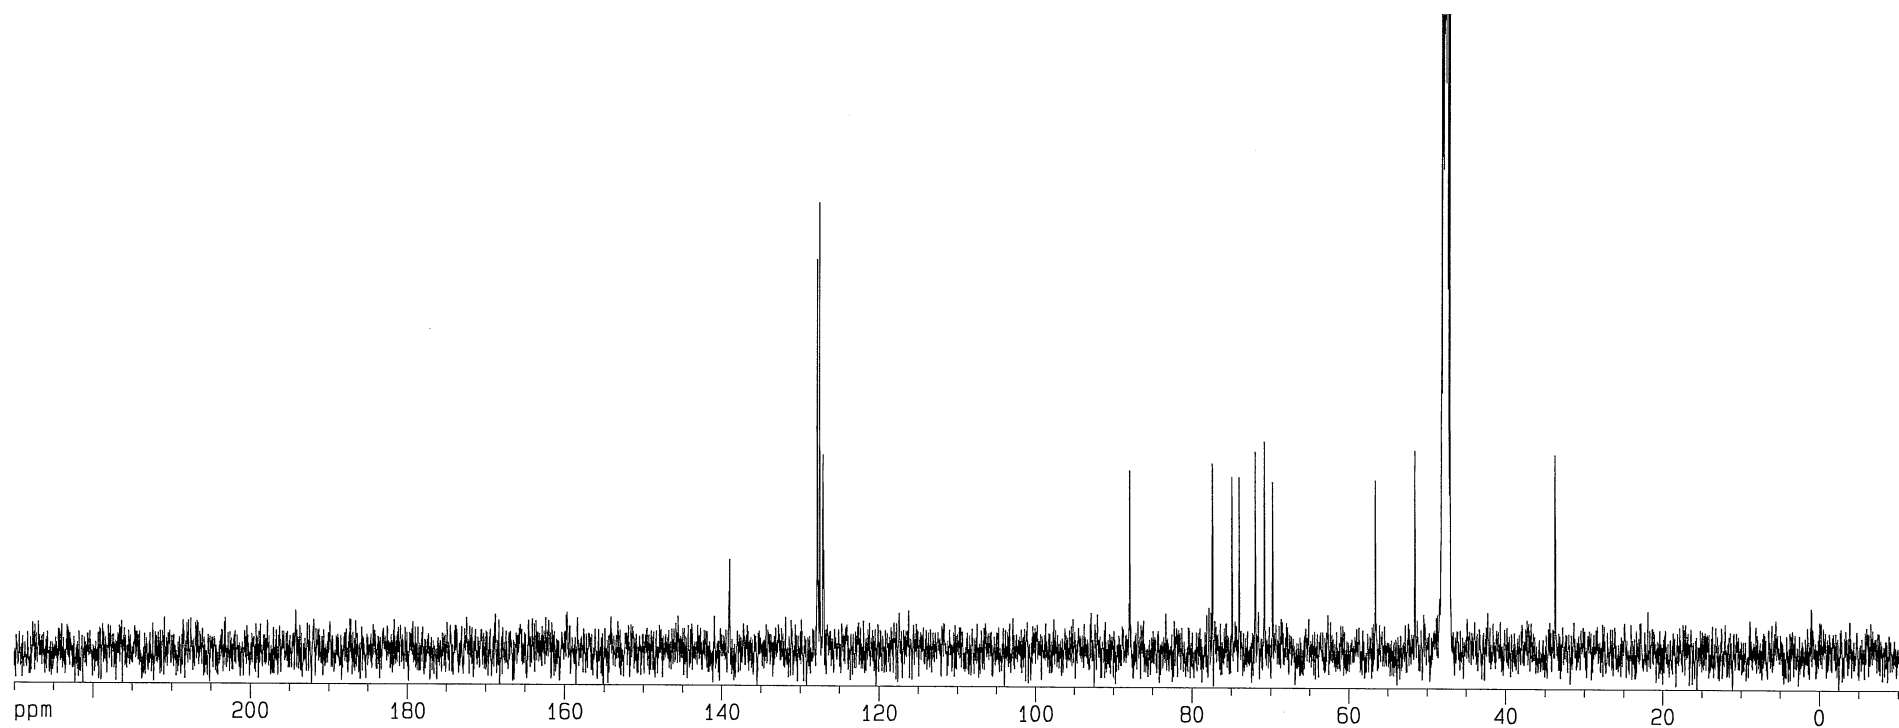

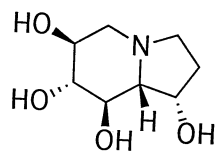

(+)-Castanospermine (2)

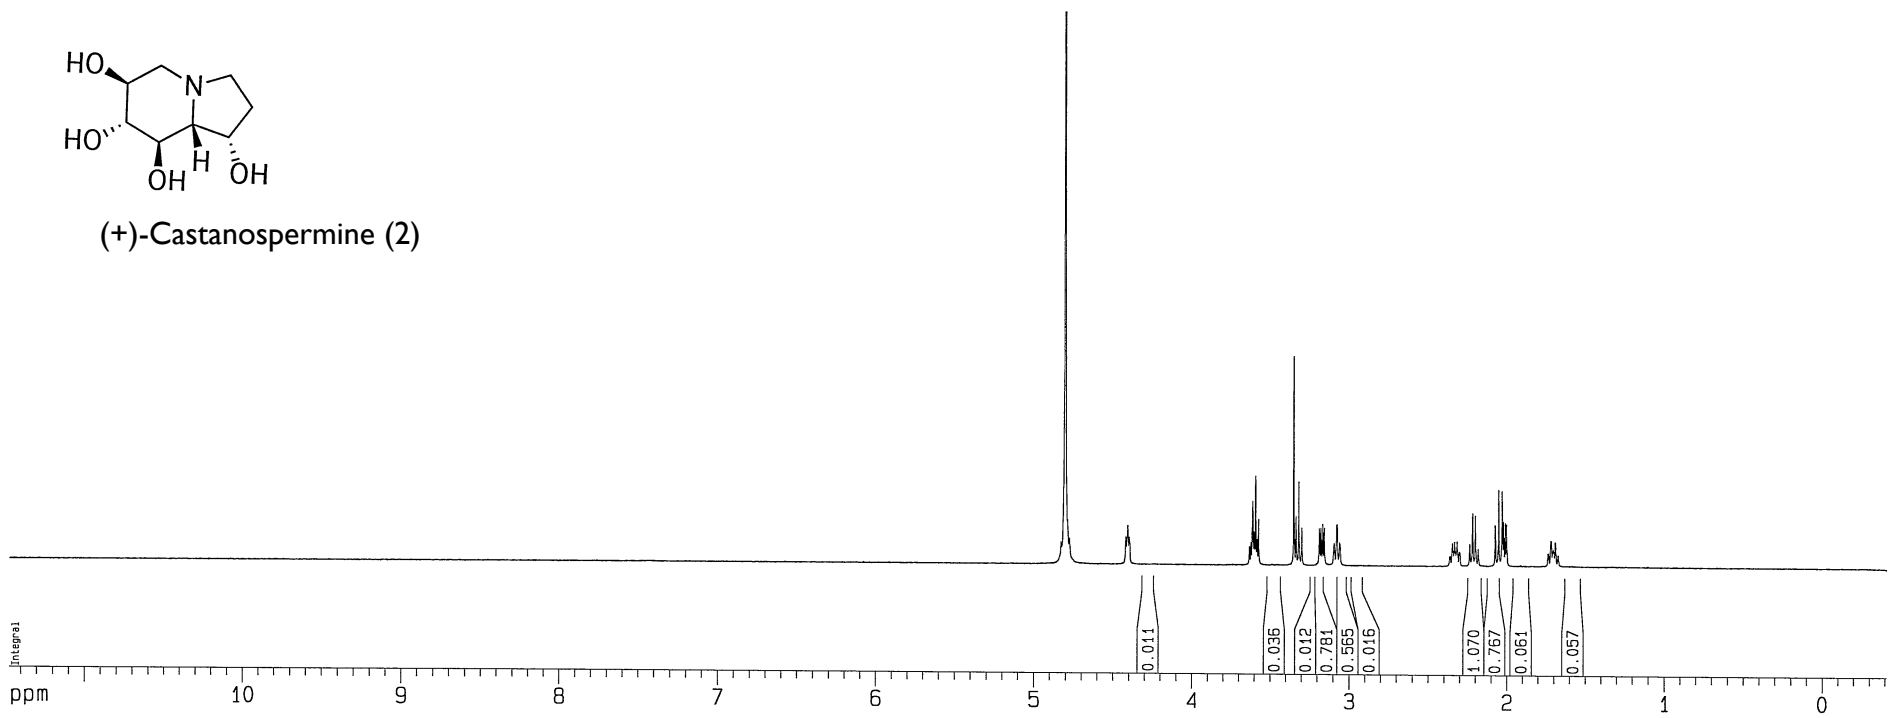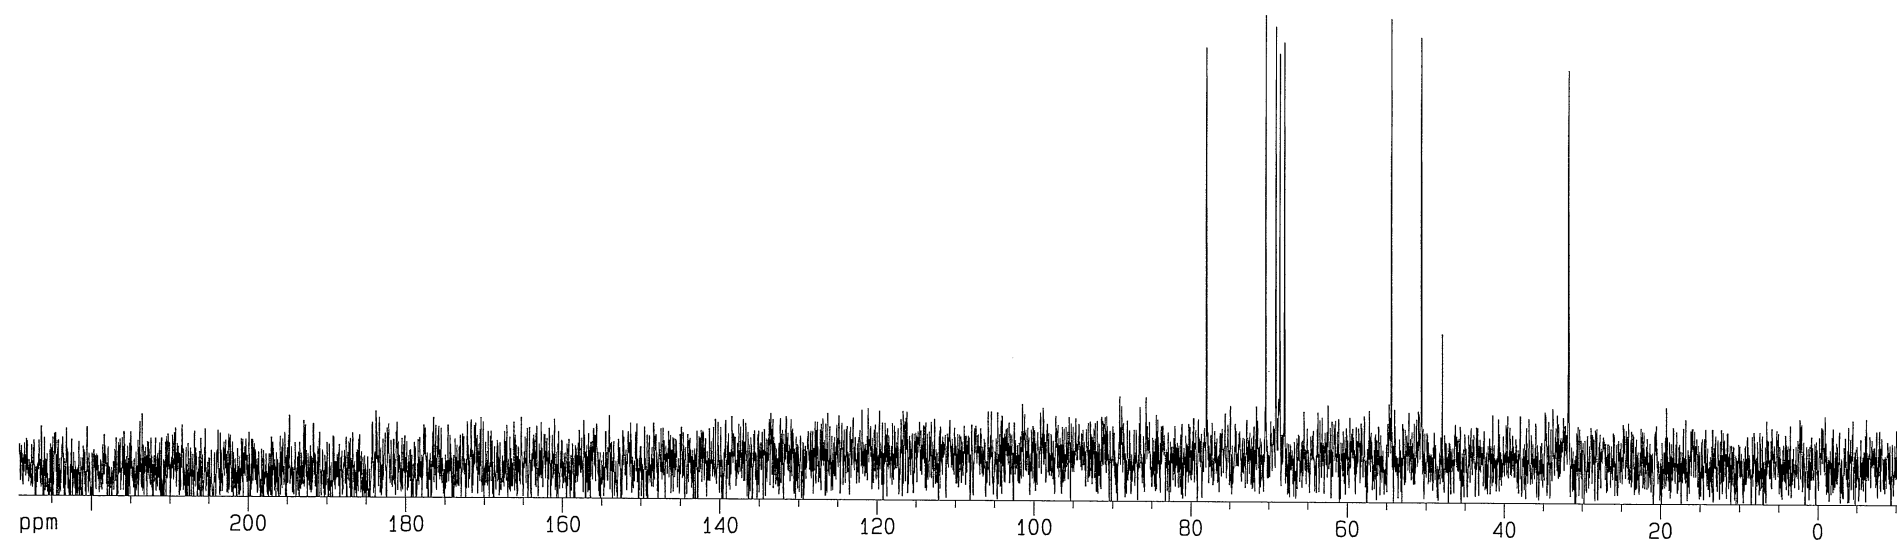

Supplement: NIHMS247304-supplement-2_si_002.pdf [file NIHMS247304-supplement-2_si_002.pdf]
